# Supplementary material for: Altered N-glycan composition impacts flagella-mediated adhesion in Chlamydomonas reinhardtii
Source: eLife. 2020 Dec 10;9:e58805. doi: 10.7554/eLife.58805 (PMC7759384; doi:10.7554/eLife.58805)
Supplement: Figure 2—source data 1. [file elife-58805-fig2-data1.xlsx]

## Sheet: Sheet1
		Fig. 2A
		portion of 0.7µm beads adhere to flagella
									ave	sd	p
		Wtins	50	48	57.6	57.2	46.1		51.78	5.31432
		IMman1a	45	42.4	48.9	45.9	46		45.64	2.33088	0.0455357
		IMxylt1A	20	27.3	33.3	40.4	43.2		32.84	9.49015	0.00458517
		IMxylt1axIMman1a	17	31.7	27.3	28.5	28.8		26.66	5.63675	8.80014e-05
		Fig. 2B
		portion of 0.7µm beads motility
										ave	sd	p
		Wtins	32.8	40.7	35.8	36	31.4	41.9		36.4333	4.17644
		IMman1a	29.8	33.1	29	17.5	16	14.3		23.2833	8.23053	0.00582332
		IMxylt1A	30		32.8	27	26.7			29.125	2.86749	0.0163704
		IMxylt1axIMman1a	30.6	28	30	26	25			27.92	2.43557	0.00308981
