# Supplementary material for: Altered N-glycan composition impacts flagella-mediated adhesion in Chlamydomonas reinhardtii
Source: eLife. 2020 Dec 10;9:e58805. doi: 10.7554/eLife.58805 (PMC7759384; doi:10.7554/eLife.58805)
Supplement: Figure 3—figure supplement 1—source data 1. [file elife-58805-fig3-figsupp1-data1.xlsx]

## Sheet: Sheet1
				Vertical tip position (μm)	Vertical deflection: retract (nN)
		-1.73046e-06	2.89296e-09	-1.73046	2.89296
		-1.73029e-06	2.89003e-09	-1.73029	2.89003
		-1.73012e-06	2.88678e-09	-1.73012	2.88678
		-1.72996e-06	2.88332e-09	-1.72996	2.88332
		-1.7298e-06	2.87986e-09	-1.7298	2.87986
		-1.72963e-06	2.87678e-09	-1.72963	2.87678
		-1.72945e-06	2.87456e-09	-1.72945	2.87456
		-1.72926e-06	2.87361e-09	-1.72926	2.87361
		-1.72906e-06	2.87413e-09	-1.72906	2.87413
		-1.72884e-06	2.87589e-09	-1.72884	2.87589
		-1.72861e-06	2.87832e-09	-1.72861	2.87832
		-1.72839e-06	2.88061e-09	-1.72839	2.88061
		-1.72817e-06	2.88188e-09	-1.72817	2.88188
		-1.72798e-06	2.88147e-09	-1.72798	2.88147
		-1.7278e-06	2.8791e-09	-1.7278	2.8791
		-1.72765e-06	2.87492e-09	-1.72765	2.87492
		-1.72751e-06	2.86942e-09	-1.72751	2.86942
		-1.72737e-06	2.8633e-09	-1.72737	2.8633
		-1.72723e-06	2.85725e-09	-1.72723	2.85725
		-1.72709e-06	2.85179e-09	-1.72709	2.85179
		-1.72694e-06	2.84722e-09	-1.72694	2.84722
		-1.72678e-06	2.84357e-09	-1.72678	2.84357
		-1.72661e-06	2.84074e-09	-1.72661	2.84074
		-1.72643e-06	2.83857e-09	-1.72643	2.83857
		-1.72625e-06	2.83691e-09	-1.72625	2.83691
		-1.72606e-06	2.83577e-09	-1.72606	2.83577
		-1.72587e-06	2.83522e-09	-1.72587	2.83522
		-1.72567e-06	2.83522e-09	-1.72567	2.83522
		-1.72546e-06	2.83562e-09	-1.72546	2.83562
		-1.72526e-06	2.83611e-09	-1.72526	2.83611
		-1.72506e-06	2.83634e-09	-1.72506	2.83634
		-1.72486e-06	2.83591e-09	-1.72486	2.83591
		-1.72467e-06	2.83463e-09	-1.72467	2.83463
		-1.7245e-06	2.83244e-09	-1.7245	2.83244
		-1.72433e-06	2.82944e-09	-1.72433	2.82944
		-1.72417e-06	2.82575e-09	-1.72417	2.82575
		-1.72401e-06	2.82153e-09	-1.72401	2.82153
		-1.72386e-06	2.81698e-09	-1.72386	2.81698
		-1.72371e-06	2.81237e-09	-1.72371	2.81237
		-1.72356e-06	2.8081e-09	-1.72356	2.8081
		-1.72339e-06	2.80451e-09	-1.72339	2.80451
		-1.72322e-06	2.80197e-09	-1.72322	2.80197
		-1.72303e-06	2.80076e-09	-1.72303	2.80076
		-1.72283e-06	2.80108e-09	-1.72283	2.80108
		-1.72261e-06	2.80292e-09	-1.72261	2.80292
		-1.72238e-06	2.80609e-09	-1.72238	2.80609
		-1.72213e-06	2.81022e-09	-1.72213	2.81022
		-1.72188e-06	2.81468e-09	-1.72188	2.81468
		-1.72164e-06	2.81874e-09	-1.72164	2.81874
		-1.72141e-06	2.82167e-09	-1.72141	2.82167
		-1.7212e-06	2.82298e-09	-1.7212	2.82298
		-1.721e-06	2.82244e-09	-1.721	2.82244
		-1.72083e-06	2.82017e-09	-1.72083	2.82017
		-1.72066e-06	2.81653e-09	-1.72066	2.81653
		-1.72051e-06	2.8121e-09	-1.72051	2.8121
		-1.72036e-06	2.80754e-09	-1.72036	2.80754
		-1.7202e-06	2.80346e-09	-1.7202	2.80346
		-1.72004e-06	2.80037e-09	-1.72004	2.80037
		-1.71986e-06	2.79851e-09	-1.71986	2.79851
		-1.71966e-06	2.79799e-09	-1.71966	2.79799
		-1.71946e-06	2.79858e-09	-1.71945	2.79858
		-1.71924e-06	2.80001e-09	-1.71924	2.80001
		-1.71902e-06	2.80185e-09	-1.71902	2.80185
		-1.7188e-06	2.80377e-09	-1.7188	2.80377
		-1.71858e-06	2.80549e-09	-1.71858	2.80549
		-1.71837e-06	2.80666e-09	-1.71837	2.80666
		-1.71816e-06	2.80707e-09	-1.71816	2.80707
		-1.71797e-06	2.80646e-09	-1.71797	2.80646
		-1.71779e-06	2.80464e-09	-1.71779	2.80464
		-1.71762e-06	2.80162e-09	-1.71762	2.80162
		-1.71746e-06	2.79764e-09	-1.71746	2.79764
		-1.71731e-06	2.79322e-09	-1.71731	2.79322
		-1.71716e-06	2.78905e-09	-1.71716	2.78905
		-1.71699e-06	2.78585e-09	-1.71699	2.78585
		-1.71681e-06	2.78408e-09	-1.71681	2.78408
		-1.71661e-06	2.78389e-09	-1.71661	2.78389
		-1.7164e-06	2.78496e-09	-1.7164	2.78496
		-1.71618e-06	2.78668e-09	-1.71618	2.78668
		-1.71596e-06	2.78817e-09	-1.71596	2.78817
		-1.71576e-06	2.78861e-09	-1.71576	2.78861
		-1.71557e-06	2.78729e-09	-1.71557	2.78729
		-1.71541e-06	2.7838e-09	-1.71541	2.7838
		-1.71527e-06	2.77799e-09	-1.71527	2.77799
		-1.71516e-06	2.7701e-09	-1.71516	2.7701
		-1.71506e-06	2.76071e-09	-1.71506	2.76071
		-1.71496e-06	2.75055e-09	-1.71496	2.75055
		-1.71487e-06	2.74055e-09	-1.71487	2.74055
		-1.71476e-06	2.73159e-09	-1.71476	2.73159
		-1.71464e-06	2.72445e-09	-1.71464	2.72445
		-1.71449e-06	2.71969e-09	-1.71449	2.71969
		-1.71431e-06	2.71756e-09	-1.71431	2.71756
		-1.71411e-06	2.71787e-09	-1.71411	2.71787
		-1.71389e-06	2.72e-09	-1.71389	2.72
		-1.71366e-06	2.723e-09	-1.71366	2.723
		-1.71343e-06	2.72583e-09	-1.71343	2.72583
		-1.71321e-06	2.72753e-09	-1.71321	2.72753
		-1.71301e-06	2.72745e-09	-1.71301	2.72745
		-1.71283e-06	2.72533e-09	-1.71283	2.72533
		-1.71267e-06	2.72116e-09	-1.71267	2.72116
		-1.71254e-06	2.7152e-09	-1.71254	2.7152
		-1.71242e-06	2.7078e-09	-1.71242	2.7078
		-1.7123e-06	2.69956e-09	-1.7123	2.69956
		-1.71219e-06	2.69116e-09	-1.71219	2.69116
		-1.71207e-06	2.68346e-09	-1.71207	2.68346
		-1.71194e-06	2.67722e-09	-1.71194	2.67722
		-1.71179e-06	2.67295e-09	-1.71179	2.67295
		-1.71161e-06	2.6708e-09	-1.71161	2.6708
		-1.71141e-06	2.6704e-09	-1.71141	2.6704
		-1.71121e-06	2.67112e-09	-1.71121	2.67112
		-1.71099e-06	2.6722e-09	-1.71099	2.6722
		-1.71079e-06	2.67286e-09	-1.71079	2.67286
		-1.71059e-06	2.6725e-09	-1.71059	2.6725
		-1.71041e-06	2.67076e-09	-1.71041	2.67076
		-1.71024e-06	2.66752e-09	-1.71024	2.66752
		-1.71009e-06	2.66295e-09	-1.71009	2.66295
		-1.70995e-06	2.65744e-09	-1.70995	2.65744
		-1.70981e-06	2.65162e-09	-1.70981	2.65162
		-1.70967e-06	2.64621e-09	-1.70967	2.64621
		-1.70952e-06	2.64189e-09	-1.70952	2.64189
		-1.70934e-06	2.6392e-09	-1.70934	2.6392
		-1.70915e-06	2.63842e-09	-1.70915	2.63842
		-1.70894e-06	2.63959e-09	-1.70894	2.63959
		-1.70871e-06	2.64244e-09	-1.70871	2.64244
		-1.70847e-06	2.64645e-09	-1.70847	2.64645
		-1.70822e-06	2.65101e-09	-1.70822	2.65101
		-1.70797e-06	2.65545e-09	-1.70797	2.65545
		-1.70773e-06	2.65922e-09	-1.70773	2.65922
		-1.7075e-06	2.66189e-09	-1.7075	2.66189
		-1.70729e-06	2.66322e-09	-1.70729	2.66322
		-1.70709e-06	2.66319e-09	-1.70709	2.66319
		-1.7069e-06	2.66192e-09	-1.7069	2.66192
		-1.70673e-06	2.65965e-09	-1.70673	2.65965
		-1.70656e-06	2.65669e-09	-1.70656	2.65669
		-1.70639e-06	2.65339e-09	-1.70639	2.65339
		-1.70623e-06	2.65018e-09	-1.70623	2.65018
		-1.70605e-06	2.64744e-09	-1.70605	2.64744
		-1.70588e-06	2.64546e-09	-1.70588	2.64546
		-1.70569e-06	2.64437e-09	-1.70569	2.64437
		-1.70549e-06	2.64419e-09	-1.70549	2.64419
		-1.70528e-06	2.64478e-09	-1.70528	2.64478
		-1.70507e-06	2.64593e-09	-1.70507	2.64593
		-1.70485e-06	2.64743e-09	-1.70485	2.64743
		-1.70464e-06	2.64907e-09	-1.70464	2.64907
		-1.70442e-06	2.65063e-09	-1.70442	2.65063
		-1.70421e-06	2.65196e-09	-1.70421	2.65196
		-1.704e-06	2.65293e-09	-1.704	2.65293
		-1.70379e-06	2.65352e-09	-1.70379	2.65352
		-1.70359e-06	2.65372e-09	-1.70359	2.65372
		-1.70339e-06	2.65355e-09	-1.70339	2.65355
		-1.7032e-06	2.6529e-09	-1.7032	2.6529
		-1.70301e-06	2.65161e-09	-1.70301	2.65161
		-1.70283e-06	2.64948e-09	-1.70283	2.64948
		-1.70266e-06	2.64641e-09	-1.70266	2.64641
		-1.70251e-06	2.64243e-09	-1.70251	2.64243
		-1.70236e-06	2.63778e-09	-1.70236	2.63778
		-1.70221e-06	2.63292e-09	-1.70221	2.63292
		-1.70206e-06	2.62831e-09	-1.70206	2.62831
		-1.7019e-06	2.62438e-09	-1.7019	2.62438
		-1.70173e-06	2.62142e-09	-1.70173	2.62142
		-1.70155e-06	2.6195e-09	-1.70155	2.6195
		-1.70136e-06	2.61849e-09	-1.70136	2.61849
		-1.70116e-06	2.61808e-09	-1.70116	2.61808
		-1.70097e-06	2.6178e-09	-1.70097	2.6178
		-1.70077e-06	2.61718e-09	-1.70077	2.61718
		-1.70059e-06	2.61582e-09	-1.70059	2.61582
		-1.70041e-06	2.61346e-09	-1.70041	2.61346
		-1.70025e-06	2.61002e-09	-1.70025	2.61002
		-1.7001e-06	2.60558e-09	-1.7001	2.60558
		-1.69995e-06	2.60044e-09	-1.69995	2.60044
		-1.69981e-06	2.5949e-09	-1.69981	2.5949
		-1.69967e-06	2.5894e-09	-1.69967	2.5894
		-1.69952e-06	2.58428e-09	-1.69952	2.58428
		-1.69937e-06	2.57988e-09	-1.69937	2.57988
		-1.69921e-06	2.57633e-09	-1.69921	2.57633
		-1.69904e-06	2.57355e-09	-1.69904	2.57355
		-1.69886e-06	2.57134e-09	-1.69886	2.57134
		-1.69868e-06	2.5693e-09	-1.69868	2.5693
		-1.69851e-06	2.567e-09	-1.69851	2.567
		-1.69834e-06	2.56413e-09	-1.69834	2.56413
		-1.69818e-06	2.56041e-09	-1.69818	2.56041
		-1.69803e-06	2.55577e-09	-1.69803	2.55577
		-1.69788e-06	2.55028e-09	-1.69788	2.55028
		-1.69775e-06	2.54422e-09	-1.69775	2.54422
		-1.69761e-06	2.538e-09	-1.69761	2.538
		-1.69747e-06	2.53226e-09	-1.69747	2.53226
		-1.69732e-06	2.52762e-09	-1.69732	2.52762
		-1.69716e-06	2.52464e-09	-1.69716	2.52464
		-1.69697e-06	2.52349e-09	-1.69697	2.52349
		-1.69676e-06	2.52404e-09	-1.69676	2.52404
		-1.69654e-06	2.52578e-09	-1.69654	2.52578
		-1.69632e-06	2.52805e-09	-1.69632	2.52805
		-1.6961e-06	2.53013e-09	-1.6961	2.53013
		-1.69588e-06	2.53151e-09	-1.69588	2.53151
		-1.69568e-06	2.53178e-09	-1.69568	2.53178
		-1.69549e-06	2.53082e-09	-1.69549	2.53082
		-1.69531e-06	2.52869e-09	-1.69531	2.52869
		-1.69515e-06	2.52554e-09	-1.69515	2.52554
		-1.69499e-06	2.52159e-09	-1.69499	2.52159
		-1.69484e-06	2.51706e-09	-1.69484	2.51706
		-1.69469e-06	2.51215e-09	-1.69469	2.51215
		-1.69454e-06	2.50714e-09	-1.69454	2.50714
		-1.69439e-06	2.50246e-09	-1.69439	2.50246
		-1.69423e-06	2.49871e-09	-1.69423	2.49871
		-1.69405e-06	2.49647e-09	-1.69405	2.49647
		-1.69386e-06	2.49621e-09	-1.69386	2.49621
		-1.69364e-06	2.49807e-09	-1.69364	2.49807
		-1.6934e-06	2.50178e-09	-1.6934	2.50178
		-1.69314e-06	2.50681e-09	-1.69314	2.50681
		-1.69288e-06	2.51238e-09	-1.69288	2.51238
		-1.69263e-06	2.51769e-09	-1.69263	2.51769
		-1.69238e-06	2.52201e-09	-1.69238	2.52201
		-1.69215e-06	2.52478e-09	-1.69215	2.52478
		-1.69194e-06	2.52582e-09	-1.69194	2.52582
		-1.69175e-06	2.5253e-09	-1.69175	2.5253
		-1.69156e-06	2.5238e-09	-1.69156	2.5238
		-1.69138e-06	2.52201e-09	-1.69138	2.52201
		-1.6912e-06	2.5205e-09	-1.6912	2.5205
		-1.69101e-06	2.51965e-09	-1.69101	2.51965
		-1.69081e-06	2.5196e-09	-1.69081	2.5196
		-1.6906e-06	2.5203e-09	-1.6906	2.5203
		-1.69038e-06	2.52175e-09	-1.69038	2.52175
		-1.69016e-06	2.52392e-09	-1.69016	2.52392
		-1.68993e-06	2.52666e-09	-1.68993	2.52666
		-1.6897e-06	2.52967e-09	-1.6897	2.52967
		-1.68947e-06	2.5325e-09	-1.68947	2.5325
		-1.68925e-06	2.53477e-09	-1.68925	2.53477
		-1.68903e-06	2.53609e-09	-1.68903	2.53609
		-1.68883e-06	2.53632e-09	-1.68883	2.53632
		-1.68864e-06	2.53542e-09	-1.68864	2.53542
		-1.68846e-06	2.53351e-09	-1.68846	2.53351
		-1.68829e-06	2.53086e-09	-1.68829	2.53086
		-1.68812e-06	2.52787e-09	-1.68812	2.52787
		-1.68795e-06	2.52505e-09	-1.68795	2.52505
		-1.68777e-06	2.52293e-09	-1.68777	2.52293
		-1.68758e-06	2.52189e-09	-1.68758	2.52189
		-1.68738e-06	2.52208e-09	-1.68738	2.52208
		-1.68717e-06	2.52325e-09	-1.68717	2.52325
		-1.68695e-06	2.52503e-09	-1.68695	2.52503
		-1.68673e-06	2.52688e-09	-1.68673	2.52688
		-1.68651e-06	2.52819e-09	-1.68651	2.52819
		-1.68631e-06	2.52847e-09	-1.68631	2.52847
		-1.68612e-06	2.52746e-09	-1.68612	2.52746
		-1.68595e-06	2.52502e-09	-1.68595	2.52502
		-1.68579e-06	2.52134e-09	-1.68579	2.52134
		-1.68563e-06	2.51683e-09	-1.68563	2.51683
		-1.68549e-06	2.51199e-09	-1.68549	2.51199
		-1.68534e-06	2.50736e-09	-1.68534	2.50736
		-1.68518e-06	2.50335e-09	-1.68518	2.50335
		-1.68501e-06	2.50021e-09	-1.68501	2.50021
		-1.68483e-06	2.49796e-09	-1.68483	2.49796
		-1.68465e-06	2.49645e-09	-1.68465	2.49645
		-1.68446e-06	2.49538e-09	-1.68446	2.49538
		-1.68427e-06	2.49436e-09	-1.68427	2.49436
		-1.68409e-06	2.49302e-09	-1.68409	2.49302
		-1.68391e-06	2.49102e-09	-1.68391	2.49103
		-1.68374e-06	2.48825e-09	-1.68374	2.48825
		-1.68358e-06	2.48458e-09	-1.68358	2.48458
		-1.68342e-06	2.47998e-09	-1.68342	2.47998
		-1.68328e-06	2.47451e-09	-1.68328	2.47451
		-1.68315e-06	2.46816e-09	-1.68315	2.46816
		-1.68303e-06	2.46111e-09	-1.68303	2.46111
		-1.6829e-06	2.45366e-09	-1.6829	2.45366
		-1.68278e-06	2.44629e-09	-1.68278	2.44629
		-1.68265e-06	2.43952e-09	-1.68265	2.43952
		-1.68251e-06	2.43382e-09	-1.68251	2.43382
		-1.68236e-06	2.42942e-09	-1.68236	2.42942
		-1.68219e-06	2.42627e-09	-1.68219	2.42627
		-1.68202e-06	2.42402e-09	-1.68202	2.42402
		-1.68184e-06	2.42222e-09	-1.68184	2.42222
		-1.68166e-06	2.4204e-09	-1.68166	2.4204
		-1.68148e-06	2.41828e-09	-1.68148	2.41828
		-1.68131e-06	2.41574e-09	-1.68131	2.41574
		-1.68114e-06	2.41283e-09	-1.68114	2.41283
		-1.68097e-06	2.40964e-09	-1.68097	2.40964
		-1.68081e-06	2.40625e-09	-1.68081	2.40625
		-1.68064e-06	2.40268e-09	-1.68064	2.40268
		-1.68049e-06	2.39889e-09	-1.68049	2.39889
		-1.68033e-06	2.39487e-09	-1.68033	2.39487
		-1.68017e-06	2.39073e-09	-1.68017	2.39073
		-1.68002e-06	2.38657e-09	-1.68002	2.38657
		-1.67986e-06	2.38255e-09	-1.67986	2.38255
		-1.6797e-06	2.37878e-09	-1.6797	2.37878
		-1.67953e-06	2.37538e-09	-1.67953	2.37538
		-1.67937e-06	2.37243e-09	-1.67937	2.37243
		-1.67919e-06	2.37006e-09	-1.67919	2.37006
		-1.67901e-06	2.36841e-09	-1.67901	2.36841
		-1.67882e-06	2.36759e-09	-1.67882	2.36759
		-1.67862e-06	2.36759e-09	-1.67862	2.36759
		-1.67841e-06	2.36822e-09	-1.67841	2.36822
		-1.6782e-06	2.36922e-09	-1.6782	2.36922
		-1.67799e-06	2.37023e-09	-1.67799	2.37023
		-1.67778e-06	2.3709e-09	-1.67778	2.3709
		-1.67758e-06	2.37106e-09	-1.67758	2.37106
		-1.67738e-06	2.37068e-09	-1.67738	2.37068
		-1.67719e-06	2.36993e-09	-1.67719	2.36993
		-1.677e-06	2.36905e-09	-1.677	2.36905
		-1.67681e-06	2.3683e-09	-1.67681	2.3683
		-1.67661e-06	2.36779e-09	-1.67661	2.36779
		-1.67642e-06	2.3675e-09	-1.67642	2.3675
		-1.67622e-06	2.36735e-09	-1.67622	2.36735
		-1.67602e-06	2.36725e-09	-1.67602	2.36725
		-1.67582e-06	2.36717e-09	-1.67582	2.36717
		-1.67562e-06	2.36728e-09	-1.67562	2.36728
		-1.67541e-06	2.36771e-09	-1.67541	2.36771
		-1.6752e-06	2.36863e-09	-1.6752	2.36863
		-1.67499e-06	2.37014e-09	-1.67499	2.37014
		-1.67477e-06	2.37224e-09	-1.67477	2.37224
		-1.67454e-06	2.3749e-09	-1.67454	2.3749
		-1.67431e-06	2.37795e-09	-1.67431	2.37795
		-1.67407e-06	2.38118e-09	-1.67407	2.38118
		-1.67384e-06	2.38429e-09	-1.67384	2.38429
		-1.67361e-06	2.38687e-09	-1.67361	2.38687
		-1.67339e-06	2.3886e-09	-1.67339	2.3886
		-1.67318e-06	2.38936e-09	-1.67318	2.38936
		-1.67298e-06	2.38927e-09	-1.67298	2.38927
		-1.67279e-06	2.38871e-09	-1.67279	2.38871
		-1.6726e-06	2.38816e-09	-1.6726	2.38816
		-1.6724e-06	2.388e-09	-1.6724	2.388
		-1.67219e-06	2.38834e-09	-1.67219	2.38835
		-1.67199e-06	2.38903e-09	-1.67199	2.38903
		-1.67178e-06	2.38969e-09	-1.67178	2.38969
		-1.67158e-06	2.38994e-09	-1.67158	2.38994
		-1.67138e-06	2.38951e-09	-1.67138	2.38951
		-1.6712e-06	2.38823e-09	-1.67119	2.38823
		-1.67102e-06	2.38616e-09	-1.67102	2.38616
		-1.67085e-06	2.38343e-09	-1.67085	2.38343
		-1.67068e-06	2.38033e-09	-1.67068	2.38033
		-1.67051e-06	2.37722e-09	-1.67051	2.37722
		-1.67034e-06	2.3745e-09	-1.67034	2.3745
		-1.67016e-06	2.37249e-09	-1.67016	2.37249
		-1.66997e-06	2.37138e-09	-1.66997	2.37138
		-1.66978e-06	2.3711e-09	-1.66978	2.3711
		-1.66957e-06	2.37135e-09	-1.66957	2.37135
		-1.66937e-06	2.37167e-09	-1.66937	2.37167
		-1.66917e-06	2.37153e-09	-1.66917	2.37153
		-1.66898e-06	2.3705e-09	-1.66898	2.3705
		-1.66881e-06	2.36826e-09	-1.66881	2.36826
		-1.66864e-06	2.36468e-09	-1.66864	2.36468
		-1.6685e-06	2.35988e-09	-1.6685	2.35988
		-1.66836e-06	2.35419e-09	-1.66836	2.35419
		-1.66822e-06	2.34811e-09	-1.66822	2.34811
		-1.66808e-06	2.34214e-09	-1.66808	2.34214
		-1.66794e-06	2.33686e-09	-1.66794	2.33686
		-1.66778e-06	2.33264e-09	-1.66778	2.33264
		-1.66761e-06	2.32978e-09	-1.66761	2.32978
		-1.66743e-06	2.32833e-09	-1.66743	2.32833
		-1.66723e-06	2.32821e-09	-1.66723	2.32821
		-1.66702e-06	2.32905e-09	-1.66702	2.32905
		-1.66681e-06	2.33032e-09	-1.66681	2.33032
		-1.6666e-06	2.33133e-09	-1.6666	2.33133
		-1.6664e-06	2.33141e-09	-1.6664	2.33141
		-1.66621e-06	2.33003e-09	-1.66621	2.33003
		-1.66604e-06	2.32696e-09	-1.66604	2.32696
		-1.66589e-06	2.32219e-09	-1.66589	2.32219
		-1.66576e-06	2.31595e-09	-1.66576	2.31595
		-1.66564e-06	2.30855e-09	-1.66564	2.30855
		-1.66553e-06	2.30045e-09	-1.66552	2.30045
		-1.66541e-06	2.29213e-09	-1.66541	2.29213
		-1.6653e-06	2.28415e-09	-1.6653	2.28415
		-1.66517e-06	2.27707e-09	-1.66517	2.27707
		-1.66503e-06	2.27132e-09	-1.66503	2.27132
		-1.66488e-06	2.26707e-09	-1.66488	2.26707
		-1.66471e-06	2.26432e-09	-1.66471	2.26432
		-1.66452e-06	2.26285e-09	-1.66452	2.26285
		-1.66433e-06	2.26244e-09	-1.66433	2.26244
		-1.66412e-06	2.2628e-09	-1.66412	2.2628
		-1.66392e-06	2.26362e-09	-1.66392	2.26362
		-1.66371e-06	2.26449e-09	-1.66371	2.26449
		-1.6635e-06	2.26499e-09	-1.6635	2.26499
		-1.6633e-06	2.26474e-09	-1.6633	2.26474
		-1.66312e-06	2.26351e-09	-1.66312	2.26351
		-1.66294e-06	2.26145e-09	-1.66294	2.26145
		-1.66277e-06	2.25891e-09	-1.66277	2.25891
		-1.66259e-06	2.25639e-09	-1.66259	2.25639
		-1.66241e-06	2.25439e-09	-1.66241	2.25439
		-1.66223e-06	2.25316e-09	-1.66223	2.25316
		-1.66203e-06	2.25271e-09	-1.66203	2.25271
		-1.66183e-06	2.25285e-09	-1.66183	2.25285
		-1.66162e-06	2.2533e-09	-1.66162	2.2533
		-1.66142e-06	2.25378e-09	-1.66142	2.25378
		-1.66122e-06	2.25403e-09	-1.66122	2.25403
		-1.66102e-06	2.25386e-09	-1.66102	2.25386
		-1.66083e-06	2.25315e-09	-1.66083	2.25315
		-1.66064e-06	2.25179e-09	-1.66064	2.25179
		-1.66046e-06	2.24979e-09	-1.66046	2.24979
		-1.66029e-06	2.2474e-09	-1.66029	2.2474
		-1.66011e-06	2.24498e-09	-1.66011	2.24498
		-1.65993e-06	2.24307e-09	-1.65993	2.24307
		-1.65974e-06	2.24216e-09	-1.65974	2.24216
		-1.65954e-06	2.24265e-09	-1.65954	2.24265
		-1.65931e-06	2.24469e-09	-1.65931	2.24469
		-1.65908e-06	2.24822e-09	-1.65908	2.24822
		-1.65883e-06	2.25297e-09	-1.65883	2.25297
		-1.65857e-06	2.25849e-09	-1.65857	2.25849
		-1.65831e-06	2.26427e-09	-1.65831	2.26427
		-1.65805e-06	2.26976e-09	-1.65805	2.26976
		-1.6578e-06	2.27445e-09	-1.6578	2.27445
		-1.65756e-06	2.27798e-09	-1.65756	2.27798
		-1.65734e-06	2.28018e-09	-1.65734	2.28018
		-1.65713e-06	2.28117e-09	-1.65713	2.28117
		-1.65693e-06	2.28123e-09	-1.65693	2.28123
		-1.65673e-06	2.28075e-09	-1.65673	2.28075
		-1.65654e-06	2.28013e-09	-1.65654	2.28012
		-1.65634e-06	2.27963e-09	-1.65634	2.27963
		-1.65615e-06	2.27938e-09	-1.65615	2.27938
		-1.65595e-06	2.27937e-09	-1.65595	2.27937
		-1.65574e-06	2.27945e-09	-1.65574	2.27945
		-1.65554e-06	2.27949e-09	-1.65554	2.27949
		-1.65535e-06	2.27939e-09	-1.65535	2.27939
		-1.65515e-06	2.27915e-09	-1.65515	2.27915
		-1.65495e-06	2.27877e-09	-1.65495	2.27877
		-1.65476e-06	2.2783e-09	-1.65476	2.2783
		-1.65456e-06	2.27764e-09	-1.65456	2.27764
		-1.65437e-06	2.27664e-09	-1.65437	2.27664
		-1.65419e-06	2.27509e-09	-1.65419	2.27509
		-1.65401e-06	2.27279e-09	-1.65401	2.27279
		-1.65385e-06	2.26971e-09	-1.65385	2.26971
		-1.65369e-06	2.266e-09	-1.65369	2.266
		-1.65353e-06	2.26199e-09	-1.65353	2.26199
		-1.65337e-06	2.25802e-09	-1.65337	2.25802
		-1.65321e-06	2.25442e-09	-1.65321	2.25442
		-1.65304e-06	2.25136e-09	-1.65304	2.25136
		-1.65287e-06	2.24886e-09	-1.65287	2.24886
		-1.65269e-06	2.24688e-09	-1.65269	2.24688
		-1.65251e-06	2.24535e-09	-1.65251	2.24535
		-1.65232e-06	2.24422e-09	-1.65232	2.24422
		-1.65213e-06	2.24342e-09	-1.65213	2.24342
		-1.65193e-06	2.24282e-09	-1.65193	2.24282
		-1.65174e-06	2.24216e-09	-1.65174	2.24216
		-1.65155e-06	2.24114e-09	-1.65155	2.24114
		-1.65137e-06	2.23939e-09	-1.65137	2.23939
		-1.6512e-06	2.23667e-09	-1.6512	2.23667
		-1.65104e-06	2.23276e-09	-1.65104	2.23276
		-1.65089e-06	2.22767e-09	-1.65089	2.22767
		-1.65076e-06	2.22147e-09	-1.65076	2.22147
		-1.65063e-06	2.21434e-09	-1.65063	2.21434
		-1.65052e-06	2.20662e-09	-1.65052	2.20662
		-1.6504e-06	2.19865e-09	-1.6504	2.19865
		-1.65028e-06	2.19091e-09	-1.65028	2.19091
		-1.65016e-06	2.18379e-09	-1.65016	2.18379
		-1.65002e-06	2.17758e-09	-1.65002	2.17758
		-1.64988e-06	2.17241e-09	-1.64988	2.17241
		-1.64972e-06	2.16832e-09	-1.64972	2.16832
		-1.64955e-06	2.16527e-09	-1.64955	2.16527
		-1.64938e-06	2.16322e-09	-1.64938	2.16322
		-1.64919e-06	2.16218e-09	-1.64919	2.16218
		-1.64899e-06	2.16222e-09	-1.64899	2.16222
		-1.64878e-06	2.16327e-09	-1.64878	2.16327
		-1.64856e-06	2.16506e-09	-1.64856	2.16506
		-1.64833e-06	2.16712e-09	-1.64833	2.16712
		-1.64812e-06	2.16884e-09	-1.64812	2.16884
		-1.64791e-06	2.16971e-09	-1.64791	2.16971
		-1.64771e-06	2.16938e-09	-1.64771	2.16938
		-1.64753e-06	2.16779e-09	-1.64753	2.16779
		-1.64736e-06	2.16514e-09	-1.64736	2.16514
		-1.64719e-06	2.16178e-09	-1.64719	2.16178
		-1.64703e-06	2.15807e-09	-1.64703	2.15807
		-1.64687e-06	2.15432e-09	-1.64687	2.15432
		-1.64671e-06	2.15074e-09	-1.64671	2.15074
		-1.64654e-06	2.14754e-09	-1.64654	2.14754
		-1.64637e-06	2.14481e-09	-1.64637	2.14481
		-1.64619e-06	2.1426e-09	-1.64619	2.1426
		-1.64601e-06	2.14091e-09	-1.64601	2.14091
		-1.64583e-06	2.13971e-09	-1.64583	2.13971
		-1.64563e-06	2.13897e-09	-1.64563	2.13897
		-1.64544e-06	2.1387e-09	-1.64544	2.1387
		-1.64523e-06	2.13886e-09	-1.64523	2.13886
		-1.64503e-06	2.13939e-09	-1.64503	2.13939
		-1.64482e-06	2.14013e-09	-1.64482	2.14013
		-1.64461e-06	2.14089e-09	-1.64461	2.14089
		-1.64441e-06	2.14149e-09	-1.64441	2.14149
		-1.6442e-06	2.14196e-09	-1.6442	2.14196
		-1.64399e-06	2.14257e-09	-1.64399	2.14257
		-1.64378e-06	2.14376e-09	-1.64378	2.14376
		-1.64356e-06	2.146e-09	-1.64356	2.146
		-1.64332e-06	2.14955e-09	-1.64332	2.14955
		-1.64307e-06	2.15432e-09	-1.64307	2.15432
		-1.64281e-06	2.15982e-09	-1.64281	2.15982
		-1.64255e-06	2.16526e-09	-1.64255	2.16526
		-1.6423e-06	2.16984e-09	-1.6423	2.16984
		-1.64207e-06	2.1729e-09	-1.64207	2.1729
		-1.64186e-06	2.17409e-09	-1.64186	2.17409
		-1.64167e-06	2.17345e-09	-1.64167	2.17345
		-1.64149e-06	2.1712e-09	-1.64149	2.1712
		-1.64133e-06	2.16781e-09	-1.64133	2.16781
		-1.64117e-06	2.16388e-09	-1.64117	2.16388
		-1.64101e-06	2.15997e-09	-1.64101	2.15997
		-1.64084e-06	2.15662e-09	-1.64084	2.15662
		-1.64067e-06	2.15421e-09	-1.64067	2.15421
		-1.64048e-06	2.15296e-09	-1.64048	2.15296
		-1.64028e-06	2.15279e-09	-1.64028	2.15279
		-1.64008e-06	2.15341e-09	-1.64008	2.15341
		-1.63987e-06	2.15438e-09	-1.63987	2.15438
		-1.63966e-06	2.15528e-09	-1.63966	2.15528
		-1.63945e-06	2.15582e-09	-1.63945	2.15582
		-1.63925e-06	2.15584e-09	-1.63925	2.15584
		-1.63906e-06	2.15546e-09	-1.63906	2.15546
		-1.63886e-06	2.15482e-09	-1.63886	2.15482
		-1.63867e-06	2.154e-09	-1.63867	2.154
		-1.63848e-06	2.15309e-09	-1.63848	2.15309
		-1.63829e-06	2.15204e-09	-1.63829	2.15204
		-1.6381e-06	2.15082e-09	-1.6381	2.15082
		-1.63792e-06	2.14955e-09	-1.63792	2.14955
		-1.63773e-06	2.14828e-09	-1.63773	2.14828
		-1.63754e-06	2.14721e-09	-1.63754	2.14721
		-1.63735e-06	2.14651e-09	-1.63735	2.14651
		-1.63715e-06	2.14619e-09	-1.63715	2.14619
		-1.63695e-06	2.14619e-09	-1.63695	2.14619
		-1.63675e-06	2.14624e-09	-1.63675	2.14624
		-1.63656e-06	2.14597e-09	-1.63656	2.14597
		-1.63637e-06	2.14491e-09	-1.63637	2.14491
		-1.63619e-06	2.14262e-09	-1.63619	2.14262
		-1.63603e-06	2.13875e-09	-1.63603	2.13875
		-1.63589e-06	2.13322e-09	-1.63589	2.13322
		-1.63577e-06	2.12617e-09	-1.63577	2.12617
		-1.63565e-06	2.11802e-09	-1.63565	2.11802
		-1.63554e-06	2.1094e-09	-1.63554	2.1094
		-1.63543e-06	2.10111e-09	-1.63543	2.10111
		-1.63531e-06	2.09387e-09	-1.63531	2.09387
		-1.63517e-06	2.08825e-09	-1.63517	2.08825
		-1.63501e-06	2.08449e-09	-1.63501	2.08449
		-1.63483e-06	2.08238e-09	-1.63483	2.08238
		-1.63464e-06	2.08141e-09	-1.63464	2.08141
		-1.63445e-06	2.08085e-09	-1.63445	2.08085
		-1.63425e-06	2.08006e-09	-1.63425	2.08006
		-1.63407e-06	2.07866e-09	-1.63407	2.07866
		-1.63389e-06	2.07655e-09	-1.63389	2.07655
		-1.63372e-06	2.07384e-09	-1.63372	2.07384
		-1.63355e-06	2.07084e-09	-1.63355	2.07084
		-1.63338e-06	2.06788e-09	-1.63338	2.06788
		-1.63321e-06	2.06509e-09	-1.63321	2.06509
		-1.63304e-06	2.06255e-09	-1.63304	2.06255
		-1.63287e-06	2.06007e-09	-1.63287	2.06007
		-1.63269e-06	2.05746e-09	-1.63269	2.05746
		-1.63253e-06	2.05448e-09	-1.63253	2.05448
		-1.63236e-06	2.05101e-09	-1.63236	2.05101
		-1.6322e-06	2.04709e-09	-1.6322	2.04709
		-1.63205e-06	2.04292e-09	-1.63205	2.04292
		-1.63189e-06	2.03878e-09	-1.63189	2.03878
		-1.63173e-06	2.03493e-09	-1.63173	2.03493
		-1.63157e-06	2.03163e-09	-1.63157	2.03163
		-1.6314e-06	2.02895e-09	-1.6314	2.02895
		-1.63122e-06	2.02695e-09	-1.63122	2.02695
		-1.63103e-06	2.02545e-09	-1.63103	2.02545
		-1.63085e-06	2.02426e-09	-1.63085	2.02426
		-1.63066e-06	2.02314e-09	-1.63066	2.02314
		-1.63047e-06	2.02198e-09	-1.63047	2.02198
		-1.63028e-06	2.02077e-09	-1.63028	2.02077
		-1.63009e-06	2.01968e-09	-1.63009	2.01968
		-1.6299e-06	2.01898e-09	-1.6299	2.01898
		-1.6297e-06	2.0188e-09	-1.6297	2.0188
		-1.6295e-06	2.01907e-09	-1.6295	2.01907
		-1.6293e-06	2.0195e-09	-1.6293	2.0195
		-1.62909e-06	2.01963e-09	-1.62909	2.01963
		-1.6289e-06	2.019e-09	-1.6289	2.019
		-1.62872e-06	2.0174e-09	-1.62872	2.0174
		-1.62854e-06	2.01492e-09	-1.62854	2.01492
		-1.62838e-06	2.01198e-09	-1.62838	2.01198
		-1.62821e-06	2.00913e-09	-1.62821	2.00913
		-1.62803e-06	2.00681e-09	-1.62803	2.00681
		-1.62785e-06	2.00524e-09	-1.62785	2.00524
		-1.62766e-06	2.00427e-09	-1.62766	2.00427
		-1.62746e-06	2.00365e-09	-1.62746	2.00365
		-1.62727e-06	2.00315e-09	-1.62727	2.00315
		-1.62707e-06	2.00272e-09	-1.62707	2.00272
		-1.62688e-06	2.00245e-09	-1.62688	2.00245
		-1.62668e-06	2.00244e-09	-1.62668	2.00244
		-1.62647e-06	2.00267e-09	-1.62647	2.00267
		-1.62627e-06	2.003e-09	-1.62627	2.003
		-1.62607e-06	2.00341e-09	-1.62607	2.00341
		-1.62586e-06	2.00403e-09	-1.62586	2.00403
		-1.62565e-06	2.0051e-09	-1.62565	2.0051
		-1.62543e-06	2.00696e-09	-1.62543	2.00696
		-1.6252e-06	2.00967e-09	-1.6252	2.00967
		-1.62496e-06	2.01299e-09	-1.62496	2.01299
		-1.62473e-06	2.01633e-09	-1.62473	2.01633
		-1.6245e-06	2.01909e-09	-1.6245	2.01909
		-1.62428e-06	2.02074e-09	-1.62428	2.02074
		-1.62408e-06	2.02099e-09	-1.62408	2.02099
		-1.62389e-06	2.01971e-09	-1.62389	2.01971
		-1.62372e-06	2.01705e-09	-1.62372	2.01705
		-1.62356e-06	2.01326e-09	-1.62356	2.01326
		-1.62341e-06	2.00873e-09	-1.62341	2.00873
		-1.62326e-06	2.00401e-09	-1.62326	2.00401
		-1.6231e-06	1.9997e-09	-1.6231	1.9997
		-1.62294e-06	1.99634e-09	-1.62294	1.99634
		-1.62276e-06	1.99426e-09	-1.62276	1.99426
		-1.62257e-06	1.99354e-09	-1.62257	1.99354
		-1.62236e-06	1.99399e-09	-1.62236	1.99399
		-1.62215e-06	1.99524e-09	-1.62215	1.99524
		-1.62193e-06	1.99688e-09	-1.62193	1.99688
		-1.62172e-06	1.99851e-09	-1.62172	1.99851
		-1.6215e-06	1.99988e-09	-1.6215	1.99988
		-1.62129e-06	2.00077e-09	-1.62129	2.00077
		-1.62109e-06	2.00103e-09	-1.62109	2.00103
		-1.62089e-06	2.00049e-09	-1.62089	2.00049
		-1.62071e-06	1.99903e-09	-1.62071	1.99903
		-1.62054e-06	1.99657e-09	-1.62054	1.99657
		-1.62037e-06	1.99318e-09	-1.62037	1.99318
		-1.62021e-06	1.98915e-09	-1.62021	1.98915
		-1.62006e-06	1.98493e-09	-1.62006	1.98493
		-1.6199e-06	1.98107e-09	-1.6199	1.98107
		-1.61973e-06	1.97803e-09	-1.61973	1.97803
		-1.61955e-06	1.97614e-09	-1.61955	1.97614
		-1.61936e-06	1.97551e-09	-1.61936	1.97551
		-1.61915e-06	1.97615e-09	-1.61915	1.97615
		-1.61894e-06	1.97777e-09	-1.61894	1.97777
		-1.61871e-06	1.98004e-09	-1.61871	1.98004
		-1.61849e-06	1.98244e-09	-1.61849	1.98244
		-1.61827e-06	1.98434e-09	-1.61827	1.98434
		-1.61806e-06	1.9851e-09	-1.61806	1.9851
		-1.61787e-06	1.98424e-09	-1.61787	1.98424
		-1.61769e-06	1.98155e-09	-1.61769	1.98155
		-1.61754e-06	1.97723e-09	-1.61754	1.97723
		-1.6174e-06	1.97174e-09	-1.6174	1.97174
		-1.61726e-06	1.96577e-09	-1.61726	1.96577
		-1.61712e-06	1.96004e-09	-1.61712	1.96004
		-1.61697e-06	1.95513e-09	-1.61697	1.95513
		-1.61682e-06	1.95132e-09	-1.61682	1.95132
		-1.61664e-06	1.9487e-09	-1.61664	1.9487
		-1.61646e-06	1.94709e-09	-1.61646	1.94709
		-1.61627e-06	1.94626e-09	-1.61627	1.94626
		-1.61607e-06	1.94599e-09	-1.61607	1.94599
		-1.61587e-06	1.94602e-09	-1.61587	1.94602
		-1.61567e-06	1.94613e-09	-1.61567	1.94613
		-1.61547e-06	1.9461e-09	-1.61547	1.9461
		-1.61527e-06	1.94572e-09	-1.61527	1.94572
		-1.61508e-06	1.94472e-09	-1.61508	1.94472
		-1.6149e-06	1.94298e-09	-1.6149	1.94298
		-1.61473e-06	1.94045e-09	-1.61473	1.94045
		-1.61456e-06	1.9372e-09	-1.61456	1.9372
		-1.6144e-06	1.93352e-09	-1.6144	1.93352
		-1.61424e-06	1.92978e-09	-1.61424	1.92978
		-1.61408e-06	1.92641e-09	-1.61408	1.92641
		-1.61391e-06	1.92378e-09	-1.61391	1.92378
		-1.61373e-06	1.92204e-09	-1.61373	1.92204
		-1.61354e-06	1.92109e-09	-1.61354	1.92109
		-1.61334e-06	1.92063e-09	-1.61334	1.92063
		-1.61314e-06	1.92025e-09	-1.61314	1.92025
		-1.61295e-06	1.91958e-09	-1.61295	1.91958
		-1.61276e-06	1.91847e-09	-1.61276	1.91847
		-1.61258e-06	1.91696e-09	-1.61258	1.91696
		-1.6124e-06	1.91529e-09	-1.6124	1.91529
		-1.61221e-06	1.9138e-09	-1.61221	1.9138
		-1.61202e-06	1.91288e-09	-1.61202	1.91288
		-1.61182e-06	1.91276e-09	-1.61182	1.91276
		-1.61162e-06	1.91351e-09	-1.61162	1.91351
		-1.6114e-06	1.91488e-09	-1.6114	1.91488
		-1.61118e-06	1.91643e-09	-1.61118	1.91643
		-1.61097e-06	1.91764e-09	-1.61097	1.91764
		-1.61077e-06	1.91803e-09	-1.61077	1.91803
		-1.61057e-06	1.91739e-09	-1.61057	1.91739
		-1.61039e-06	1.91582e-09	-1.61039	1.91582
		-1.61021e-06	1.91374e-09	-1.61021	1.91374
		-1.61003e-06	1.91171e-09	-1.61003	1.91171
		-1.60985e-06	1.91038e-09	-1.60985	1.91038
		-1.60965e-06	1.9103e-09	-1.60965	1.9103
		-1.60943e-06	1.91173e-09	-1.60943	1.91173
		-1.6092e-06	1.91462e-09	-1.6092	1.91462
		-1.60896e-06	1.91855e-09	-1.60896	1.91855
		-1.60871e-06	1.92296e-09	-1.60871	1.92296
		-1.60847e-06	1.92723e-09	-1.60847	1.92723
		-1.60823e-06	1.93085e-09	-1.60823	1.93085
		-1.608e-06	1.93353e-09	-1.608	1.93353
		-1.60778e-06	1.93524e-09	-1.60778	1.93524
		-1.60757e-06	1.9361e-09	-1.60757	1.9361
		-1.60737e-06	1.9363e-09	-1.60737	1.9363
		-1.60717e-06	1.93604e-09	-1.60717	1.93604
		-1.60698e-06	1.93543e-09	-1.60698	1.93543
		-1.60679e-06	1.93451e-09	-1.60679	1.93451
		-1.6066e-06	1.93322e-09	-1.6066	1.93322
		-1.60642e-06	1.93151e-09	-1.60642	1.93151
		-1.60624e-06	1.92938e-09	-1.60624	1.92938
		-1.60607e-06	1.927e-09	-1.60607	1.927
		-1.6059e-06	1.92464e-09	-1.6059	1.92464
		-1.60572e-06	1.92254e-09	-1.60572	1.92254
		-1.60553e-06	1.92096e-09	-1.60553	1.92096
		-1.60534e-06	1.91996e-09	-1.60534	1.91996
		-1.60515e-06	1.91948e-09	-1.60515	1.91948
		-1.60495e-06	1.91933e-09	-1.60495	1.91933
		-1.60475e-06	1.91925e-09	-1.60475	1.91925
		-1.60455e-06	1.91903e-09	-1.60455	1.91903
		-1.60436e-06	1.91845e-09	-1.60436	1.91845
		-1.60417e-06	1.91742e-09	-1.60417	1.91742
		-1.60399e-06	1.91599e-09	-1.60399	1.91599
		-1.6038e-06	1.91427e-09	-1.6038	1.91427
		-1.60362e-06	1.91244e-09	-1.60362	1.91244
		-1.60344e-06	1.91066e-09	-1.60344	1.91066
		-1.60326e-06	1.90909e-09	-1.60326	1.90909
		-1.60307e-06	1.90785e-09	-1.60307	1.90785
		-1.60288e-06	1.90701e-09	-1.60288	1.90701
		-1.60269e-06	1.90658e-09	-1.60269	1.90658
		-1.60249e-06	1.90647e-09	-1.60249	1.90647
		-1.60229e-06	1.90639e-09	-1.60229	1.90639
		-1.60209e-06	1.90602e-09	-1.60209	1.90602
		-1.6019e-06	1.90501e-09	-1.6019	1.90501
		-1.60172e-06	1.90321e-09	-1.60172	1.90321
		-1.60155e-06	1.90057e-09	-1.60155	1.90057
		-1.60138e-06	1.89723e-09	-1.60138	1.89723
		-1.60122e-06	1.89343e-09	-1.60122	1.89343
		-1.60107e-06	1.88931e-09	-1.60107	1.88931
		-1.60091e-06	1.88502e-09	-1.60091	1.88502
		-1.60076e-06	1.88067e-09	-1.60076	1.88067
		-1.60061e-06	1.87627e-09	-1.60061	1.87627
		-1.60045e-06	1.87193e-09	-1.60045	1.87193
		-1.6003e-06	1.86773e-09	-1.6003	1.86773
		-1.60014e-06	1.8638e-09	-1.60014	1.8638
		-1.59998e-06	1.86033e-09	-1.59998	1.86033
		-1.59981e-06	1.85752e-09	-1.59981	1.85752
		-1.59963e-06	1.85545e-09	-1.59963	1.85545
		-1.59944e-06	1.85402e-09	-1.59944	1.85402
		-1.59925e-06	1.85305e-09	-1.59925	1.85305
		-1.59906e-06	1.85232e-09	-1.59906	1.85232
		-1.59887e-06	1.85162e-09	-1.59887	1.85162
		-1.59867e-06	1.85097e-09	-1.59867	1.85097
		-1.59848e-06	1.85047e-09	-1.59848	1.85047
		-1.59828e-06	1.85029e-09	-1.59828	1.85029
		-1.59808e-06	1.85044e-09	-1.59808	1.85044
		-1.59788e-06	1.85072e-09	-1.59788	1.85072
		-1.59768e-06	1.85084e-09	-1.59768	1.85084
		-1.59748e-06	1.85037e-09	-1.59748	1.85037
		-1.5973e-06	1.84903e-09	-1.5973	1.84903
		-1.59712e-06	1.84665e-09	-1.59712	1.84665
		-1.59696e-06	1.84321e-09	-1.59696	1.84321
		-1.5968e-06	1.83882e-09	-1.5968	1.83882
		-1.59666e-06	1.83371e-09	-1.59666	1.83371
		-1.59652e-06	1.82817e-09	-1.59652	1.82817
		-1.59638e-06	1.82259e-09	-1.59638	1.82259
		-1.59623e-06	1.81745e-09	-1.59623	1.81745
		-1.59607e-06	1.81324e-09	-1.59607	1.81324
		-1.59591e-06	1.81023e-09	-1.59591	1.81023
		-1.59572e-06	1.80855e-09	-1.59572	1.80855
		-1.59553e-06	1.80802e-09	-1.59553	1.80802
		-1.59533e-06	1.80818e-09	-1.59533	1.80818
		-1.59512e-06	1.80854e-09	-1.59512	1.80854
		-1.59492e-06	1.80867e-09	-1.59492	1.80867
		-1.59473e-06	1.80839e-09	-1.59473	1.80839
		-1.59453e-06	1.80776e-09	-1.59453	1.80776
		-1.59434e-06	1.80702e-09	-1.59434	1.80702
		-1.59415e-06	1.80645e-09	-1.59415	1.80645
		-1.59395e-06	1.80621e-09	-1.59395	1.80621
		-1.59375e-06	1.80641e-09	-1.59375	1.80641
		-1.59354e-06	1.80706e-09	-1.59354	1.80706
		-1.59333e-06	1.80819e-09	-1.59333	1.80819
		-1.59311e-06	1.80984e-09	-1.59311	1.80984
		-1.59289e-06	1.81209e-09	-1.59289	1.81209
		-1.59266e-06	1.81497e-09	-1.59265	1.81497
		-1.59242e-06	1.81846e-09	-1.59242	1.81846
		-1.59218e-06	1.82241e-09	-1.59218	1.82241
		-1.59193e-06	1.82664e-09	-1.59193	1.82664
		-1.59169e-06	1.83075e-09	-1.59169	1.83075
		-1.59145e-06	1.83426e-09	-1.59145	1.83426
		-1.59122e-06	1.83671e-09	-1.59122	1.83671
		-1.59101e-06	1.83774e-09	-1.59101	1.83774
		-1.59082e-06	1.83724e-09	-1.59082	1.83724
		-1.59064e-06	1.83536e-09	-1.59064	1.83536
		-1.59047e-06	1.83248e-09	-1.59047	1.83248
		-1.59031e-06	1.82899e-09	-1.59031	1.82899
		-1.59015e-06	1.82519e-09	-1.59015	1.82519
		-1.58999e-06	1.82141e-09	-1.58999	1.82141
		-1.58982e-06	1.81789e-09	-1.58982	1.81789
		-1.58965e-06	1.81498e-09	-1.58965	1.81498
		-1.58947e-06	1.81302e-09	-1.58947	1.81302
		-1.58928e-06	1.81235e-09	-1.58928	1.81235
		-1.58907e-06	1.81305e-09	-1.58907	1.81305
		-1.58885e-06	1.81499e-09	-1.58885	1.81499
		-1.58863e-06	1.81765e-09	-1.58863	1.81765
		-1.5884e-06	1.82038e-09	-1.5884	1.82038
		-1.58817e-06	1.82245e-09	-1.58817	1.82245
		-1.58796e-06	1.82332e-09	-1.58797	1.82332
		-1.58777e-06	1.82265e-09	-1.58777	1.82265
		-1.5876e-06	1.82038e-09	-1.5876	1.82038
		-1.58743e-06	1.81681e-09	-1.58743	1.81681
		-1.58728e-06	1.81244e-09	-1.58728	1.81244
		-1.58713e-06	1.8079e-09	-1.58713	1.8079
		-1.58697e-06	1.80382e-09	-1.58697	1.80382
		-1.5868e-06	1.80078e-09	-1.5868	1.80078
		-1.58662e-06	1.79909e-09	-1.58662	1.79909
		-1.58643e-06	1.79872e-09	-1.58643	1.79872
		-1.58622e-06	1.79933e-09	-1.58622	1.79933
		-1.58601e-06	1.80028e-09	-1.58601	1.80028
		-1.5858e-06	1.80078e-09	-1.5858	1.80078
		-1.58561e-06	1.80014e-09	-1.58561	1.80014
		-1.58543e-06	1.79797e-09	-1.58543	1.79797
		-1.58527e-06	1.79427e-09	-1.58527	1.79427
		-1.58512e-06	1.78949e-09	-1.58512	1.78949
		-1.58498e-06	1.78431e-09	-1.58498	1.78431
		-1.58483e-06	1.77943e-09	-1.58483	1.77943
		-1.58467e-06	1.77531e-09	-1.58467	1.77531
		-1.58451e-06	1.77213e-09	-1.58451	1.77213
		-1.58433e-06	1.76978e-09	-1.58433	1.76978
		-1.58415e-06	1.76799e-09	-1.58415	1.76799
		-1.58397e-06	1.76647e-09	-1.58397	1.76647
		-1.58378e-06	1.76502e-09	-1.58378	1.76502
		-1.5836e-06	1.76347e-09	-1.5836	1.76347
		-1.58342e-06	1.76175e-09	-1.58342	1.76175
		-1.58324e-06	1.75978e-09	-1.58324	1.75978
		-1.58306e-06	1.75751e-09	-1.58306	1.75751
		-1.58289e-06	1.75485e-09	-1.58289	1.75485
		-1.58272e-06	1.75172e-09	-1.58272	1.75172
		-1.58256e-06	1.748e-09	-1.58256	1.748
		-1.58241e-06	1.74359e-09	-1.58241	1.74359
		-1.58226e-06	1.73863e-09	-1.58226	1.73863
		-1.58212e-06	1.73341e-09	-1.58212	1.73341
		-1.58197e-06	1.72853e-09	-1.58197	1.72853
		-1.58181e-06	1.72472e-09	-1.58181	1.72472
		-1.58163e-06	1.72261e-09	-1.58163	1.72261
		-1.58143e-06	1.72262e-09	-1.58143	1.72262
		-1.58121e-06	1.72474e-09	-1.58121	1.72474
		-1.58097e-06	1.72846e-09	-1.58097	1.72846
		-1.58072e-06	1.73293e-09	-1.58072	1.73293
		-1.58048e-06	1.73708e-09	-1.58048	1.73708
		-1.58025e-06	1.73991e-09	-1.58025	1.73991
		-1.58004e-06	1.74073e-09	-1.58004	1.74073
		-1.57985e-06	1.73932e-09	-1.57985	1.73932
		-1.57969e-06	1.73602e-09	-1.57969	1.73602
		-1.57954e-06	1.7315e-09	-1.57954	1.7315
		-1.57939e-06	1.72668e-09	-1.57939	1.72668
		-1.57923e-06	1.72235e-09	-1.57923	1.72235
		-1.57907e-06	1.71902e-09	-1.57907	1.71902
		-1.57889e-06	1.71689e-09	-1.57889	1.71689
		-1.5787e-06	1.71585e-09	-1.5787	1.71585
		-1.57851e-06	1.71563e-09	-1.57851	1.71563
		-1.5783e-06	1.71594e-09	-1.5783	1.71594
		-1.5781e-06	1.71657e-09	-1.5781	1.71657
		-1.57789e-06	1.71748e-09	-1.57789	1.71748
		-1.57767e-06	1.71862e-09	-1.57767	1.71862
		-1.57746e-06	1.72003e-09	-1.57746	1.72003
		-1.57724e-06	1.72172e-09	-1.57724	1.72172
		-1.57702e-06	1.72364e-09	-1.57702	1.72364
		-1.5768e-06	1.72571e-09	-1.5768	1.72571
		-1.57658e-06	1.72779e-09	-1.57658	1.72779
		-1.57635e-06	1.72978e-09	-1.57635	1.72978
		-1.57614e-06	1.73151e-09	-1.57614	1.73151
		-1.57592e-06	1.73281e-09	-1.57592	1.73281
		-1.57571e-06	1.73352e-09	-1.57571	1.73352
		-1.57551e-06	1.7335e-09	-1.57551	1.7335
		-1.57532e-06	1.73271e-09	-1.57532	1.73271
		-1.57514e-06	1.73122e-09	-1.57514	1.73122
		-1.57496e-06	1.72925e-09	-1.57496	1.72925
		-1.57478e-06	1.7271e-09	-1.57478	1.7271
		-1.5746e-06	1.72519e-09	-1.5746	1.72519
		-1.57442e-06	1.72391e-09	-1.57442	1.72391
		-1.57422e-06	1.72353e-09	-1.57422	1.72353
		-1.57401e-06	1.72409e-09	-1.57401	1.72409
		-1.5738e-06	1.72547e-09	-1.5738	1.72547
		-1.57358e-06	1.72736e-09	-1.57358	1.72736
		-1.57336e-06	1.72937e-09	-1.57336	1.72937
		-1.57314e-06	1.73115e-09	-1.57314	1.73115
		-1.57292e-06	1.73246e-09	-1.57292	1.73246
		-1.57272e-06	1.73322e-09	-1.57272	1.73322
		-1.57251e-06	1.73344e-09	-1.57251	1.73344
		-1.57232e-06	1.73319e-09	-1.57232	1.73319
		-1.57212e-06	1.73258e-09	-1.57212	1.73258
		-1.57193e-06	1.73172e-09	-1.57193	1.73172
		-1.57174e-06	1.73071e-09	-1.57174	1.73071
		-1.57155e-06	1.72972e-09	-1.57155	1.72972
		-1.57136e-06	1.72892e-09	-1.57136	1.72892
		-1.57117e-06	1.72856e-09	-1.57117	1.72856
		-1.57096e-06	1.72891e-09	-1.57096	1.72891
		-1.57075e-06	1.73011e-09	-1.57075	1.73011
		-1.57053e-06	1.73203e-09	-1.57053	1.73203
		-1.5703e-06	1.73431e-09	-1.5703	1.73431
		-1.57008e-06	1.73643e-09	-1.57008	1.73643
		-1.56987e-06	1.73777e-09	-1.56987	1.73777
		-1.56967e-06	1.73791e-09	-1.56967	1.73791
		-1.56948e-06	1.73675e-09	-1.56948	1.73675
		-1.5693e-06	1.73446e-09	-1.5693	1.73446
		-1.56913e-06	1.73141e-09	-1.56913	1.73141
		-1.56897e-06	1.72796e-09	-1.56897	1.72796
		-1.56881e-06	1.72446e-09	-1.56881	1.72446
		-1.56864e-06	1.7212e-09	-1.56864	1.7212
		-1.56847e-06	1.71834e-09	-1.56847	1.71834
		-1.5683e-06	1.71605e-09	-1.5683	1.71605
		-1.56811e-06	1.71446e-09	-1.56811	1.71446
		-1.56792e-06	1.71368e-09	-1.56792	1.71368
		-1.56772e-06	1.71361e-09	-1.56772	1.71361
		-1.56752e-06	1.7139e-09	-1.56752	1.7139
		-1.56732e-06	1.71405e-09	-1.56732	1.71405
		-1.56713e-06	1.71336e-09	-1.56713	1.71336
		-1.56695e-06	1.71121e-09	-1.56695	1.71121
		-1.56679e-06	1.70714e-09	-1.56679	1.70714
		-1.56666e-06	1.70099e-09	-1.56666	1.70099
		-1.56654e-06	1.69308e-09	-1.56654	1.69308
		-1.56644e-06	1.68403e-09	-1.56644	1.68403
		-1.56634e-06	1.67477e-09	-1.56634	1.67477
		-1.56622e-06	1.6663e-09	-1.56622	1.6663
		-1.5661e-06	1.65946e-09	-1.5661	1.65946
		-1.56595e-06	1.65481e-09	-1.56595	1.65481
		-1.56577e-06	1.65251e-09	-1.56577	1.65251
		-1.56557e-06	1.65236e-09	-1.56557	1.65236
		-1.56536e-06	1.65394e-09	-1.56536	1.65394
		-1.56513e-06	1.65668e-09	-1.56513	1.65668
		-1.56489e-06	1.6599e-09	-1.56489	1.6599
		-1.56466e-06	1.66287e-09	-1.56466	1.66287
		-1.56444e-06	1.66495e-09	-1.56444	1.66495
		-1.56423e-06	1.66556e-09	-1.56423	1.66556
		-1.56404e-06	1.66443e-09	-1.56404	1.66443
		-1.56387e-06	1.66162e-09	-1.56387	1.66162
		-1.56372e-06	1.65745e-09	-1.56372	1.65745
		-1.56357e-06	1.65243e-09	-1.56357	1.65243
		-1.56343e-06	1.64719e-09	-1.56343	1.64719
		-1.56328e-06	1.64232e-09	-1.56328	1.64232
		-1.56312e-06	1.63835e-09	-1.56312	1.63835
		-1.56295e-06	1.63564e-09	-1.56295	1.63564
		-1.56276e-06	1.63435e-09	-1.56276	1.63435
		-1.56256e-06	1.63449e-09	-1.56256	1.63449
		-1.56235e-06	1.63571e-09	-1.56235	1.63571
		-1.56213e-06	1.63764e-09	-1.56213	1.63764
		-1.5619e-06	1.63988e-09	-1.5619	1.63988
		-1.56168e-06	1.64211e-09	-1.56168	1.64211
		-1.56146e-06	1.64399e-09	-1.56146	1.64399
		-1.56125e-06	1.64527e-09	-1.56125	1.64527
		-1.56104e-06	1.64567e-09	-1.56104	1.64567
		-1.56085e-06	1.64494e-09	-1.56085	1.64494
		-1.56067e-06	1.64305e-09	-1.56067	1.64305
		-1.5605e-06	1.64016e-09	-1.5605	1.64016
		-1.56034e-06	1.63674e-09	-1.56034	1.63674
		-1.56017e-06	1.63352e-09	-1.56017	1.63352
		-1.56e-06	1.6312e-09	-1.56	1.6312
		-1.5598e-06	1.63034e-09	-1.5598	1.63034
		-1.5596e-06	1.63118e-09	-1.5596	1.63118
		-1.55937e-06	1.63368e-09	-1.55937	1.63368
		-1.55913e-06	1.63749e-09	-1.55913	1.63749
		-1.55888e-06	1.64214e-09	-1.55888	1.64214
		-1.55863e-06	1.64713e-09	-1.55863	1.64713
		-1.55837e-06	1.65207e-09	-1.55837	1.65207
		-1.55812e-06	1.65667e-09	-1.55812	1.65667
		-1.55788e-06	1.66078e-09	-1.55788	1.66078
		-1.55764e-06	1.6643e-09	-1.55764	1.6643
		-1.55741e-06	1.66731e-09	-1.55741	1.66731
		-1.55718e-06	1.66985e-09	-1.55718	1.66985
		-1.55696e-06	1.672e-09	-1.55696	1.672
		-1.55674e-06	1.6738e-09	-1.55674	1.6738
		-1.55653e-06	1.6752e-09	-1.55653	1.6752
		-1.55632e-06	1.67616e-09	-1.55632	1.67616
		-1.55611e-06	1.6766e-09	-1.55611	1.6766
		-1.55591e-06	1.6765e-09	-1.55591	1.6765
		-1.55572e-06	1.67595e-09	-1.55572	1.67595
		-1.55553e-06	1.67514e-09	-1.55553	1.67514
		-1.55534e-06	1.67432e-09	-1.55534	1.67432
		-1.55514e-06	1.67367e-09	-1.55514	1.67367
		-1.55495e-06	1.67324e-09	-1.55495	1.67324
		-1.55475e-06	1.67298e-09	-1.55475	1.67298
		-1.55455e-06	1.67261e-09	-1.55455	1.67261
		-1.55436e-06	1.67185e-09	-1.55436	1.67185
		-1.55418e-06	1.67047e-09	-1.55418	1.67047
		-1.554e-06	1.66839e-09	-1.554	1.66839
		-1.55383e-06	1.66578e-09	-1.55383	1.66578
		-1.55366e-06	1.66295e-09	-1.55366	1.66295
		-1.55348e-06	1.66028e-09	-1.55348	1.66028
		-1.55331e-06	1.65811e-09	-1.55331	1.65811
		-1.55312e-06	1.65653e-09	-1.55312	1.65653
		-1.55294e-06	1.65546e-09	-1.55294	1.65546
		-1.55274e-06	1.65461e-09	-1.55274	1.65461
		-1.55255e-06	1.65371e-09	-1.55255	1.65371
		-1.55237e-06	1.6526e-09	-1.55237	1.6526
		-1.55218e-06	1.65127e-09	-1.55218	1.65127
		-1.55199e-06	1.64989e-09	-1.55199	1.64989
		-1.55181e-06	1.6486e-09	-1.55181	1.6486
		-1.55162e-06	1.64748e-09	-1.55162	1.64748
		-1.55143e-06	1.64633e-09	-1.55143	1.64633
		-1.55125e-06	1.64482e-09	-1.55125	1.64482
		-1.55107e-06	1.6426e-09	-1.55107	1.6426
		-1.55091e-06	1.63931e-09	-1.55091	1.63931
		-1.55075e-06	1.63489e-09	-1.55075	1.63489
		-1.55061e-06	1.62948e-09	-1.55061	1.62948
		-1.55048e-06	1.6234e-09	-1.55048	1.6234
		-1.55034e-06	1.61704e-09	-1.55034	1.61704
		-1.55021e-06	1.61074e-09	-1.55021	1.61074
		-1.55007e-06	1.60477e-09	-1.55007	1.60477
		-1.54993e-06	1.59932e-09	-1.54993	1.59932
		-1.54978e-06	1.59463e-09	-1.54978	1.59463
		-1.54962e-06	1.59087e-09	-1.54962	1.59087
		-1.54945e-06	1.58814e-09	-1.54945	1.58814
		-1.54927e-06	1.58629e-09	-1.54927	1.58629
		-1.54908e-06	1.58494e-09	-1.54908	1.58494
		-1.5489e-06	1.58358e-09	-1.5489	1.58358
		-1.54872e-06	1.58164e-09	-1.54872	1.58164
		-1.54855e-06	1.57871e-09	-1.54855	1.57871
		-1.54839e-06	1.5746e-09	-1.54839	1.5746
		-1.54825e-06	1.56941e-09	-1.54825	1.56941
		-1.54811e-06	1.56349e-09	-1.54811	1.56349
		-1.54798e-06	1.55735e-09	-1.54798	1.55735
		-1.54784e-06	1.55162e-09	-1.54784	1.55162
		-1.54769e-06	1.547e-09	-1.54769	1.547
		-1.54752e-06	1.54413e-09	-1.54752	1.54413
		-1.54732e-06	1.54336e-09	-1.54732	1.54336
		-1.54711e-06	1.54473e-09	-1.54711	1.54473
		-1.54688e-06	1.54789e-09	-1.54688	1.54789
		-1.54663e-06	1.55209e-09	-1.54663	1.55208
		-1.54639e-06	1.55637e-09	-1.54639	1.55637
		-1.54615e-06	1.55983e-09	-1.54615	1.55983
		-1.54593e-06	1.56177e-09	-1.54593	1.56177
		-1.54573e-06	1.5618e-09	-1.54573	1.5618
		-1.54555e-06	1.5599e-09	-1.54555	1.5599
		-1.54539e-06	1.55627e-09	-1.54539	1.55627
		-1.54524e-06	1.55134e-09	-1.54524	1.55134
		-1.5451e-06	1.5456e-09	-1.5451	1.5456
		-1.54496e-06	1.53962e-09	-1.54496	1.53962
		-1.54482e-06	1.53391e-09	-1.54482	1.53391
		-1.54468e-06	1.52902e-09	-1.54468	1.52902
		-1.54451e-06	1.5254e-09	-1.54451	1.5254
		-1.54434e-06	1.52336e-09	-1.54434	1.52336
		-1.54414e-06	1.52304e-09	-1.54414	1.52304
		-1.54392e-06	1.52445e-09	-1.54392	1.52445
		-1.54369e-06	1.5275e-09	-1.54369	1.5275
		-1.54344e-06	1.5319e-09	-1.54344	1.5319
		-1.54319e-06	1.53734e-09	-1.54319	1.53734
		-1.54292e-06	1.54341e-09	-1.54292	1.54341
		-1.54266e-06	1.54956e-09	-1.54266	1.54956
		-1.5424e-06	1.55522e-09	-1.5424	1.55522
		-1.54215e-06	1.55991e-09	-1.54215	1.55991
		-1.54191e-06	1.56336e-09	-1.54191	1.56336
		-1.54169e-06	1.56554e-09	-1.54169	1.56554
		-1.54147e-06	1.56674e-09	-1.54147	1.56674
		-1.54127e-06	1.56739e-09	-1.54127	1.56739
		-1.54106e-06	1.568e-09	-1.54106	1.568
		-1.54085e-06	1.56897e-09	-1.54085	1.56897
		-1.54063e-06	1.57051e-09	-1.54063	1.57051
		-1.54041e-06	1.57263e-09	-1.54041	1.57263
		-1.54018e-06	1.57522e-09	-1.54018	1.57522
		-1.53995e-06	1.57809e-09	-1.53995	1.57809
		-1.53972e-06	1.58103e-09	-1.53972	1.58103
		-1.53949e-06	1.58386e-09	-1.53949	1.58386
		-1.53926e-06	1.58648e-09	-1.53926	1.58648
		-1.53904e-06	1.58885e-09	-1.53904	1.58885
		-1.53882e-06	1.5909e-09	-1.53882	1.5909
		-1.5386e-06	1.59264e-09	-1.5386	1.59264
		-1.53838e-06	1.59413e-09	-1.53838	1.59413
		-1.53817e-06	1.59539e-09	-1.53817	1.59539
		-1.53796e-06	1.59643e-09	-1.53796	1.59643
		-1.53775e-06	1.59727e-09	-1.53775	1.59727
		-1.53754e-06	1.59787e-09	-1.53754	1.59787
		-1.53734e-06	1.59824e-09	-1.53734	1.59824
		-1.53714e-06	1.59849e-09	-1.53714	1.59849
		-1.53693e-06	1.59874e-09	-1.53693	1.59874
		-1.53673e-06	1.5991e-09	-1.53673	1.5991
		-1.53652e-06	1.5996e-09	-1.53652	1.5996
		-1.53632e-06	1.60016e-09	-1.53632	1.60016
		-1.53611e-06	1.60054e-09	-1.53611	1.60054
		-1.53591e-06	1.60051e-09	-1.53591	1.60051
		-1.53572e-06	1.59982e-09	-1.53572	1.59982
		-1.53554e-06	1.59838e-09	-1.53554	1.59838
		-1.53536e-06	1.59616e-09	-1.53536	1.59616
		-1.53519e-06	1.59328e-09	-1.53519	1.59328
		-1.53503e-06	1.58993e-09	-1.53503	1.58993
		-1.53486e-06	1.58631e-09	-1.53486	1.58631
		-1.5347e-06	1.58261e-09	-1.5347	1.58261
		-1.53454e-06	1.57896e-09	-1.53454	1.57896
		-1.53438e-06	1.5755e-09	-1.53438	1.5755
		-1.53421e-06	1.57226e-09	-1.53421	1.57226
		-1.53404e-06	1.56927e-09	-1.53404	1.56927
		-1.53387e-06	1.56648e-09	-1.53387	1.56648
		-1.5337e-06	1.56371e-09	-1.5337	1.56371
		-1.53354e-06	1.56071e-09	-1.53354	1.56071
		-1.53337e-06	1.55728e-09	-1.53337	1.55728
		-1.53321e-06	1.55322e-09	-1.53321	1.55322
		-1.53306e-06	1.54853e-09	-1.53306	1.54853
		-1.53292e-06	1.54335e-09	-1.53292	1.54335
		-1.53278e-06	1.53785e-09	-1.53278	1.53785
		-1.53264e-06	1.53223e-09	-1.53264	1.53223
		-1.5325e-06	1.52664e-09	-1.5325	1.52664
		-1.53235e-06	1.52125e-09	-1.53235	1.52125
		-1.53221e-06	1.51619e-09	-1.53221	1.51619
		-1.53206e-06	1.51169e-09	-1.53206	1.51169
		-1.5319e-06	1.50791e-09	-1.5319	1.50791
		-1.53173e-06	1.50496e-09	-1.53173	1.50496
		-1.53155e-06	1.50281e-09	-1.53155	1.50281
		-1.53137e-06	1.50129e-09	-1.53137	1.50129
		-1.53118e-06	1.50007e-09	-1.53118	1.50007
		-1.53099e-06	1.49876e-09	-1.53099	1.49876
		-1.53081e-06	1.49696e-09	-1.53081	1.49696
		-1.53064e-06	1.49446e-09	-1.53064	1.49446
		-1.53047e-06	1.49121e-09	-1.53047	1.49121
		-1.53031e-06	1.4875e-09	-1.53031	1.4875
		-1.53015e-06	1.48374e-09	-1.53015	1.48374
		-1.52999e-06	1.48033e-09	-1.52999	1.48033
		-1.52982e-06	1.47744e-09	-1.52982	1.47744
		-1.52964e-06	1.47498e-09	-1.52964	1.47498
		-1.52947e-06	1.47267e-09	-1.52947	1.47267
		-1.52929e-06	1.47025e-09	-1.52929	1.47025
		-1.52912e-06	1.46761e-09	-1.52912	1.46761
		-1.52895e-06	1.4649e-09	-1.52895	1.4649
		-1.52878e-06	1.46249e-09	-1.52878	1.46249
		-1.52859e-06	1.46077e-09	-1.52859	1.46077
		-1.5284e-06	1.46013e-09	-1.5284	1.46013
		-1.5282e-06	1.46073e-09	-1.5282	1.46073
		-1.52798e-06	1.46256e-09	-1.52798	1.46256
		-1.52774e-06	1.4655e-09	-1.52774	1.4655
		-1.5275e-06	1.46924e-09	-1.5275	1.46924
		-1.52726e-06	1.47345e-09	-1.52726	1.47345
		-1.52701e-06	1.4778e-09	-1.52701	1.4778
		-1.52677e-06	1.48199e-09	-1.52677	1.48199
		-1.52653e-06	1.48578e-09	-1.52653	1.48578
		-1.52629e-06	1.48904e-09	-1.52629	1.48904
		-1.52607e-06	1.49176e-09	-1.52607	1.49176
		-1.52584e-06	1.494e-09	-1.52584	1.494
		-1.52562e-06	1.4959e-09	-1.52562	1.4959
		-1.5254e-06	1.4977e-09	-1.5254	1.4977
		-1.52518e-06	1.49957e-09	-1.52518	1.49957
		-1.52496e-06	1.50171e-09	-1.52496	1.50171
		-1.52473e-06	1.50425e-09	-1.52473	1.50425
		-1.5245e-06	1.50726e-09	-1.5245	1.50726
		-1.52426e-06	1.51069e-09	-1.52426	1.51069
		-1.52402e-06	1.51437e-09	-1.52402	1.51437
		-1.52378e-06	1.51807e-09	-1.52378	1.51807
		-1.52355e-06	1.52155e-09	-1.52355	1.52155
		-1.52331e-06	1.52467e-09	-1.52331	1.52467
		-1.52309e-06	1.52743e-09	-1.52309	1.52743
		-1.52286e-06	1.52992e-09	-1.52286	1.52992
		-1.52263e-06	1.53228e-09	-1.52263	1.53228
		-1.52241e-06	1.53462e-09	-1.52241	1.53462
		-1.52218e-06	1.53698e-09	-1.52218	1.53698
		-1.52196e-06	1.53937e-09	-1.52196	1.53937
		-1.52173e-06	1.54176e-09	-1.52173	1.54176
		-1.52151e-06	1.54414e-09	-1.52151	1.54414
		-1.52128e-06	1.54651e-09	-1.52128	1.54651
		-1.52106e-06	1.54873e-09	-1.52106	1.54873
		-1.52084e-06	1.55069e-09	-1.52084	1.55069
		-1.52062e-06	1.55212e-09	-1.52062	1.55212
		-1.52042e-06	1.55273e-09	-1.52042	1.55273
		-1.52022e-06	1.55227e-09	-1.52022	1.55227
		-1.52004e-06	1.55061e-09	-1.52004	1.55061
		-1.51987e-06	1.54776e-09	-1.51987	1.54776
		-1.51971e-06	1.54397e-09	-1.51971	1.54397
		-1.51955e-06	1.53964e-09	-1.51955	1.53964
		-1.5194e-06	1.53529e-09	-1.5194	1.53529
		-1.51924e-06	1.53144e-09	-1.51924	1.53144
		-1.51907e-06	1.52852e-09	-1.51907	1.52852
		-1.51889e-06	1.52676e-09	-1.51889	1.52676
		-1.5187e-06	1.52622e-09	-1.5187	1.52622
		-1.51849e-06	1.52668e-09	-1.51849	1.52668
		-1.51828e-06	1.52777e-09	-1.51828	1.52777
		-1.51807e-06	1.52899e-09	-1.51807	1.52899
		-1.51786e-06	1.52977e-09	-1.51786	1.52977
		-1.51766e-06	1.52966e-09	-1.51766	1.52966
		-1.51747e-06	1.52836e-09	-1.51747	1.52836
		-1.5173e-06	1.52574e-09	-1.5173	1.52574
		-1.51714e-06	1.52189e-09	-1.51714	1.52189
		-1.51699e-06	1.51696e-09	-1.51699	1.51696
		-1.51686e-06	1.51112e-09	-1.51686	1.51112
		-1.51673e-06	1.50462e-09	-1.51673	1.50462
		-1.5166e-06	1.49763e-09	-1.5166	1.49763
		-1.51648e-06	1.49043e-09	-1.51648	1.49043
		-1.51635e-06	1.4833e-09	-1.51635	1.4833
		-1.51622e-06	1.47665e-09	-1.51622	1.47665
		-1.51608e-06	1.47086e-09	-1.51608	1.47086
		-1.51593e-06	1.46619e-09	-1.51593	1.46619
		-1.51577e-06	1.4628e-09	-1.51577	1.4628
		-1.51559e-06	1.46049e-09	-1.51559	1.46049
		-1.51541e-06	1.45901e-09	-1.51541	1.45901
		-1.51522e-06	1.45787e-09	-1.51522	1.45787
		-1.51503e-06	1.45664e-09	-1.51503	1.45664
		-1.51485e-06	1.45495e-09	-1.51485	1.45495
		-1.51468e-06	1.45247e-09	-1.51468	1.45247
		-1.51452e-06	1.44899e-09	-1.51452	1.44899
		-1.51436e-06	1.44441e-09	-1.51436	1.44441
		-1.51422e-06	1.43882e-09	-1.51422	1.43882
		-1.51409e-06	1.43251e-09	-1.51409	1.43251
		-1.51396e-06	1.426e-09	-1.51396	1.426
		-1.51382e-06	1.41991e-09	-1.51382	1.41991
		-1.51368e-06	1.41487e-09	-1.51368	1.41487
		-1.51352e-06	1.41129e-09	-1.51352	1.41129
		-1.51334e-06	1.40944e-09	-1.51334	1.40944
		-1.51314e-06	1.40919e-09	-1.51314	1.40919
		-1.51293e-06	1.41019e-09	-1.51293	1.41019
		-1.51271e-06	1.41194e-09	-1.51271	1.41193
		-1.51249e-06	1.4138e-09	-1.51249	1.4138
		-1.51227e-06	1.41532e-09	-1.51227	1.41532
		-1.51206e-06	1.41613e-09	-1.51206	1.41613
		-1.51186e-06	1.41618e-09	-1.51186	1.41618
		-1.51167e-06	1.41554e-09	-1.51167	1.41554
		-1.51148e-06	1.41434e-09	-1.51148	1.41434
		-1.5113e-06	1.41272e-09	-1.5113	1.41272
		-1.51112e-06	1.41077e-09	-1.51112	1.41077
		-1.51094e-06	1.4086e-09	-1.51094	1.4086
		-1.51077e-06	1.40636e-09	-1.51077	1.40636
		-1.51059e-06	1.40422e-09	-1.51059	1.40422
		-1.51041e-06	1.40234e-09	-1.51041	1.40234
		-1.51023e-06	1.40081e-09	-1.51023	1.40081
		-1.51004e-06	1.39969e-09	-1.51004	1.39969
		-1.50984e-06	1.39907e-09	-1.50984	1.39907
		-1.50964e-06	1.39899e-09	-1.50964	1.39899
		-1.50944e-06	1.39961e-09	-1.50944	1.39961
		-1.50922e-06	1.40099e-09	-1.50922	1.40099
		-1.509e-06	1.4032e-09	-1.509	1.4032
		-1.50877e-06	1.40618e-09	-1.50877	1.40618
		-1.50853e-06	1.4098e-09	-1.50853	1.4098
		-1.50829e-06	1.41399e-09	-1.50829	1.41399
		-1.50804e-06	1.41863e-09	-1.50804	1.41863
		-1.50778e-06	1.4238e-09	-1.50778	1.4238
		-1.50752e-06	1.42954e-09	-1.50752	1.42954
		-1.50725e-06	1.43586e-09	-1.50725	1.43586
		-1.50698e-06	1.44263e-09	-1.50698	1.44263
		-1.50671e-06	1.44958e-09	-1.50671	1.44958
		-1.50644e-06	1.45629e-09	-1.50644	1.45629
		-1.50617e-06	1.4623e-09	-1.50617	1.4623
		-1.50592e-06	1.46727e-09	-1.50592	1.46727
		-1.50568e-06	1.47105e-09	-1.50568	1.47105
		-1.50545e-06	1.47368e-09	-1.50545	1.47368
		-1.50523e-06	1.47533e-09	-1.50523	1.47533
		-1.50502e-06	1.47628e-09	-1.50502	1.47628
		-1.50482e-06	1.47677e-09	-1.50482	1.47677
		-1.50461e-06	1.47706e-09	-1.50461	1.47706
		-1.50441e-06	1.47731e-09	-1.50441	1.47731
		-1.50421e-06	1.47766e-09	-1.50421	1.47766
		-1.504e-06	1.47817e-09	-1.504	1.47817
		-1.5038e-06	1.47876e-09	-1.5038	1.47876
		-1.50359e-06	1.47931e-09	-1.50359	1.47931
		-1.50339e-06	1.47968e-09	-1.50339	1.47968
		-1.50318e-06	1.47985e-09	-1.50318	1.47985
		-1.50298e-06	1.4799e-09	-1.50298	1.4799
		-1.50278e-06	1.47994e-09	-1.50278	1.47994
		-1.50258e-06	1.48003e-09	-1.50258	1.48003
		-1.50238e-06	1.48017e-09	-1.50238	1.48017
		-1.50218e-06	1.48011e-09	-1.50218	1.48011
		-1.50199e-06	1.47957e-09	-1.50199	1.47957
		-1.5018e-06	1.47825e-09	-1.5018	1.47825
		-1.50163e-06	1.47595e-09	-1.50163	1.47595
		-1.50146e-06	1.47261e-09	-1.50146	1.47261
		-1.50131e-06	1.46835e-09	-1.50131	1.46835
		-1.50116e-06	1.46338e-09	-1.50116	1.46338
		-1.50101e-06	1.45806e-09	-1.50101	1.45806
		-1.50087e-06	1.45283e-09	-1.50087	1.45283
		-1.50072e-06	1.44807e-09	-1.50072	1.44807
		-1.50056e-06	1.4441e-09	-1.50056	1.4441
		-1.50039e-06	1.44113e-09	-1.50039	1.44113
		-1.50022e-06	1.43914e-09	-1.50022	1.43914
		-1.50003e-06	1.43796e-09	-1.50003	1.43796
		-1.49984e-06	1.43727e-09	-1.49984	1.43727
		-1.49964e-06	1.43664e-09	-1.49964	1.43664
		-1.49945e-06	1.43564e-09	-1.49945	1.43564
		-1.49927e-06	1.4338e-09	-1.49927	1.4338
		-1.49911e-06	1.43063e-09	-1.49911	1.43063
		-1.49895e-06	1.42598e-09	-1.49895	1.42598
		-1.49882e-06	1.41987e-09	-1.49882	1.41987
		-1.4987e-06	1.41261e-09	-1.4987	1.41261
		-1.49858e-06	1.40478e-09	-1.49858	1.40478
		-1.49846e-06	1.39698e-09	-1.49846	1.39698
		-1.49834e-06	1.38969e-09	-1.49834	1.38969
		-1.49821e-06	1.38329e-09	-1.49821	1.38329
		-1.49806e-06	1.37796e-09	-1.49806	1.37796
		-1.49791e-06	1.37387e-09	-1.49791	1.37387
		-1.49774e-06	1.37107e-09	-1.49774	1.37107
		-1.49755e-06	1.36956e-09	-1.49755	1.36956
		-1.49736e-06	1.3691e-09	-1.49736	1.3691
		-1.49716e-06	1.36931e-09	-1.49716	1.36931
		-1.49695e-06	1.36969e-09	-1.49695	1.36969
		-1.49675e-06	1.36982e-09	-1.49675	1.36982
		-1.49655e-06	1.36944e-09	-1.49655	1.36944
		-1.49637e-06	1.36837e-09	-1.49637	1.36837
		-1.49618e-06	1.36662e-09	-1.49618	1.36662
		-1.49601e-06	1.36428e-09	-1.49601	1.36428
		-1.49584e-06	1.36137e-09	-1.49584	1.36137
		-1.49567e-06	1.35809e-09	-1.49567	1.35809
		-1.49551e-06	1.3547e-09	-1.49551	1.3547
		-1.49534e-06	1.35156e-09	-1.49534	1.35156
		-1.49517e-06	1.34901e-09	-1.49517	1.34901
		-1.49499e-06	1.34731e-09	-1.49499	1.34731
		-1.4948e-06	1.34648e-09	-1.4948	1.34648
		-1.4946e-06	1.34636e-09	-1.4946	1.34636
		-1.4944e-06	1.34663e-09	-1.4944	1.34663
		-1.49419e-06	1.34697e-09	-1.49419	1.34697
		-1.49399e-06	1.3471e-09	-1.49399	1.3471
		-1.49379e-06	1.34693e-09	-1.49379	1.34693
		-1.4936e-06	1.34644e-09	-1.4936	1.34644
		-1.4934e-06	1.3458e-09	-1.4934	1.3458
		-1.49321e-06	1.34523e-09	-1.49321	1.34523
		-1.49301e-06	1.34512e-09	-1.49301	1.34512
		-1.4928e-06	1.34579e-09	-1.4928	1.34579
		-1.49259e-06	1.34752e-09	-1.49259	1.34752
		-1.49235e-06	1.35046e-09	-1.49235	1.35046
		-1.49211e-06	1.35453e-09	-1.49211	1.35453
		-1.49186e-06	1.35955e-09	-1.49186	1.35955
		-1.4916e-06	1.36523e-09	-1.4916	1.36523
		-1.49133e-06	1.37129e-09	-1.49133	1.37129
		-1.49107e-06	1.37747e-09	-1.49107	1.37747
		-1.4908e-06	1.38356e-09	-1.4908	1.38356
		-1.49054e-06	1.38931e-09	-1.49054	1.38931
		-1.49029e-06	1.39447e-09	-1.49029	1.39447
		-1.49004e-06	1.39874e-09	-1.49004	1.39874
		-1.48981e-06	1.40186e-09	-1.48981	1.40186
		-1.48959e-06	1.40368e-09	-1.48959	1.40368
		-1.48938e-06	1.40417e-09	-1.48938	1.40417
		-1.48919e-06	1.40357e-09	-1.48919	1.40357
		-1.489e-06	1.40225e-09	-1.489	1.40225
		-1.48882e-06	1.40077e-09	-1.48882	1.40077
		-1.48863e-06	1.39967e-09	-1.48863	1.39967
		-1.48843e-06	1.39934e-09	-1.48843	1.39934
		-1.48823e-06	1.39997e-09	-1.48823	1.39997
		-1.48801e-06	1.40152e-09	-1.48801	1.40152
		-1.48779e-06	1.40382e-09	-1.48779	1.40382
		-1.48756e-06	1.4066e-09	-1.48756	1.4066
		-1.48732e-06	1.40965e-09	-1.48732	1.40965
		-1.48709e-06	1.41274e-09	-1.48709	1.41274
		-1.48686e-06	1.41557e-09	-1.48686	1.41557
		-1.48664e-06	1.41779e-09	-1.48664	1.41779
		-1.48642e-06	1.41903e-09	-1.48642	1.41903
		-1.48623e-06	1.41894e-09	-1.48623	1.41894
		-1.48604e-06	1.41737e-09	-1.48604	1.41737
		-1.48587e-06	1.41443e-09	-1.48587	1.41443
		-1.48572e-06	1.41051e-09	-1.48572	1.41051
		-1.48556e-06	1.40622e-09	-1.48556	1.40622
		-1.4854e-06	1.40223e-09	-1.4854	1.40223
		-1.48524e-06	1.39913e-09	-1.48524	1.39913
		-1.48506e-06	1.39727e-09	-1.48506	1.39727
		-1.48486e-06	1.39667e-09	-1.48486	1.39667
		-1.48466e-06	1.39717e-09	-1.48466	1.39717
		-1.48444e-06	1.3984e-09	-1.48444	1.3984
		-1.48423e-06	1.39996e-09	-1.48423	1.39996
		-1.48401e-06	1.40147e-09	-1.48401	1.40147
		-1.4838e-06	1.40254e-09	-1.4838	1.40254
		-1.4836e-06	1.40268e-09	-1.4836	1.40268
		-1.48341e-06	1.40134e-09	-1.48341	1.40134
		-1.48325e-06	1.3981e-09	-1.48325	1.3981
		-1.4831e-06	1.39274e-09	-1.4831	1.39274
		-1.48298e-06	1.38546e-09	-1.48298	1.38546
		-1.48287e-06	1.37687e-09	-1.48287	1.37687
		-1.48277e-06	1.36783e-09	-1.48277	1.36783
		-1.48266e-06	1.35919e-09	-1.48266	1.35919
		-1.48254e-06	1.35156e-09	-1.48254	1.35156
		-1.48241e-06	1.34517e-09	-1.48241	1.34517
		-1.48226e-06	1.33997e-09	-1.48226	1.33997
		-1.48211e-06	1.33579e-09	-1.48211	1.33579
		-1.48194e-06	1.33241e-09	-1.48194	1.33241
		-1.48177e-06	1.32965e-09	-1.48177	1.32965
		-1.4816e-06	1.32735e-09	-1.4816	1.32735
		-1.48142e-06	1.32532e-09	-1.48142	1.32532
		-1.48124e-06	1.32333e-09	-1.48124	1.32333
		-1.48106e-06	1.3212e-09	-1.48106	1.3212
		-1.48089e-06	1.31888e-09	-1.48089	1.31888
		-1.48071e-06	1.31641e-09	-1.48071	1.31641
		-1.48054e-06	1.3139e-09	-1.48054	1.3139
		-1.48037e-06	1.31139e-09	-1.48037	1.31139
		-1.48019e-06	1.30887e-09	-1.48019	1.30887
		-1.48002e-06	1.30622e-09	-1.48002	1.30622
		-1.47985e-06	1.3034e-09	-1.47985	1.3034
		-1.47968e-06	1.30049e-09	-1.47968	1.30049
		-1.47951e-06	1.29765e-09	-1.47951	1.29765
		-1.47934e-06	1.29518e-09	-1.47934	1.29518
		-1.47916e-06	1.2933e-09	-1.47916	1.2933
		-1.47897e-06	1.29208e-09	-1.47897	1.29208
		-1.47878e-06	1.2914e-09	-1.47878	1.2914
		-1.47858e-06	1.29103e-09	-1.47858	1.29103
		-1.47838e-06	1.29069e-09	-1.47838	1.29069
		-1.47819e-06	1.29015e-09	-1.47819	1.29015
		-1.478e-06	1.28934e-09	-1.478	1.28934
		-1.47781e-06	1.2883e-09	-1.47781	1.2883
		-1.47762e-06	1.28715e-09	-1.47762	1.28715
		-1.47743e-06	1.28597e-09	-1.47743	1.28597
		-1.47725e-06	1.28478e-09	-1.47725	1.28478
		-1.47706e-06	1.28352e-09	-1.47706	1.28352
		-1.47688e-06	1.28207e-09	-1.47688	1.28207
		-1.47669e-06	1.28046e-09	-1.47669	1.28046
		-1.47651e-06	1.27872e-09	-1.47651	1.27872
		-1.47633e-06	1.27707e-09	-1.47633	1.27707
		-1.47614e-06	1.27574e-09	-1.47614	1.27574
		-1.47595e-06	1.27502e-09	-1.47595	1.27502
		-1.47575e-06	1.27508e-09	-1.47575	1.27508
		-1.47554e-06	1.27599e-09	-1.47554	1.27599
		-1.47532e-06	1.27777e-09	-1.47532	1.27777
		-1.47509e-06	1.28033e-09	-1.47509	1.28033
		-1.47486e-06	1.28357e-09	-1.47486	1.28357
		-1.47462e-06	1.28728e-09	-1.47462	1.28728
		-1.47438e-06	1.29125e-09	-1.47438	1.29125
		-1.47414e-06	1.29514e-09	-1.47414	1.29514
		-1.4739e-06	1.29854e-09	-1.4739	1.29854
		-1.47367e-06	1.30115e-09	-1.47367	1.30115
		-1.47345e-06	1.30283e-09	-1.47345	1.30283
		-1.47324e-06	1.30383e-09	-1.47324	1.30383
		-1.47303e-06	1.30482e-09	-1.47303	1.30482
		-1.47281e-06	1.30657e-09	-1.47281	1.30657
		-1.47258e-06	1.30978e-09	-1.47258	1.30978
		-1.47233e-06	1.31485e-09	-1.47233	1.31485
		-1.47206e-06	1.32153e-09	-1.47206	1.32153
		-1.47177e-06	1.32909e-09	-1.47178	1.32909
		-1.4715e-06	1.33644e-09	-1.4715	1.33644
		-1.47123e-06	1.34258e-09	-1.47123	1.34258
		-1.47099e-06	1.34674e-09	-1.47099	1.34674
		-1.47077e-06	1.34858e-09	-1.47077	1.34858
		-1.47057e-06	1.34826e-09	-1.47057	1.34826
		-1.47039e-06	1.34625e-09	-1.47039	1.34625
		-1.47022e-06	1.34325e-09	-1.47022	1.34325
		-1.47006e-06	1.33999e-09	-1.47006	1.33999
		-1.46989e-06	1.33714e-09	-1.46989	1.33714
		-1.46971e-06	1.33525e-09	-1.46971	1.33525
		-1.46951e-06	1.33471e-09	-1.46951	1.33471
		-1.4693e-06	1.33575e-09	-1.4693	1.33575
		-1.46908e-06	1.33828e-09	-1.46908	1.33828
		-1.46884e-06	1.34204e-09	-1.46884	1.34204
		-1.46859e-06	1.3466e-09	-1.46859	1.3466
		-1.46834e-06	1.35127e-09	-1.46834	1.35127
		-1.4681e-06	1.35531e-09	-1.4681	1.35531
		-1.46787e-06	1.35802e-09	-1.46787	1.35802
		-1.46766e-06	1.35886e-09	-1.46766	1.35886
		-1.46747e-06	1.35755e-09	-1.46747	1.35755
		-1.46731e-06	1.35418e-09	-1.46731	1.35418
		-1.46716e-06	1.34919e-09	-1.46716	1.34919
		-1.46702e-06	1.34326e-09	-1.46702	1.34326
		-1.46689e-06	1.3371e-09	-1.46689	1.3371
		-1.46675e-06	1.3313e-09	-1.46675	1.3313
		-1.4666e-06	1.3262e-09	-1.4666	1.3262
		-1.46645e-06	1.32191e-09	-1.46645	1.32191
		-1.46629e-06	1.31842e-09	-1.46629	1.31842
		-1.46612e-06	1.3157e-09	-1.46612	1.3157
		-1.46594e-06	1.31369e-09	-1.46594	1.31369
		-1.46575e-06	1.3124e-09	-1.46575	1.3124
		-1.46556e-06	1.3118e-09	-1.46556	1.3118
		-1.46536e-06	1.31164e-09	-1.46536	1.31164
		-1.46516e-06	1.31147e-09	-1.46516	1.31147
		-1.46497e-06	1.31066e-09	-1.46497	1.31066
		-1.46479e-06	1.3085e-09	-1.46479	1.3085
		-1.46463e-06	1.3044e-09	-1.46463	1.3044
		-1.4645e-06	1.29819e-09	-1.4645	1.29819
		-1.46439e-06	1.29016e-09	-1.46439	1.29016
		-1.46428e-06	1.28107e-09	-1.46428	1.28107
		-1.46418e-06	1.27188e-09	-1.46418	1.27188
		-1.46407e-06	1.26357e-09	-1.46407	1.26357
		-1.46394e-06	1.25683e-09	-1.46394	1.25683
		-1.46379e-06	1.25194e-09	-1.46379	1.25194
		-1.46363e-06	1.24871e-09	-1.46363	1.24871
		-1.46345e-06	1.24666e-09	-1.46345	1.24666
		-1.46326e-06	1.24512e-09	-1.46326	1.24512
		-1.46308e-06	1.24345e-09	-1.46308	1.24345
		-1.4629e-06	1.24128e-09	-1.4629	1.24128
		-1.46273e-06	1.23848e-09	-1.46273	1.23848
		-1.46257e-06	1.2352e-09	-1.46257	1.2352
		-1.46241e-06	1.23175e-09	-1.46241	1.23175
		-1.46224e-06	1.22851e-09	-1.46224	1.22851
		-1.46207e-06	1.22568e-09	-1.46207	1.22568
		-1.46189e-06	1.22339e-09	-1.46189	1.22339
		-1.46171e-06	1.22158e-09	-1.46171	1.22158
		-1.46153e-06	1.22008e-09	-1.46153	1.22008
		-1.46134e-06	1.21878e-09	-1.46134	1.21878
		-1.46116e-06	1.21759e-09	-1.46116	1.21759
		-1.46097e-06	1.21652e-09	-1.46097	1.21652
		-1.46078e-06	1.21557e-09	-1.46078	1.21557
		-1.46059e-06	1.21465e-09	-1.46059	1.21465
		-1.4604e-06	1.21356e-09	-1.4604	1.21356
		-1.46021e-06	1.21201e-09	-1.46021	1.212
		-1.46004e-06	1.20978e-09	-1.46004	1.20978
		-1.45987e-06	1.20693e-09	-1.45987	1.20693
		-1.4597e-06	1.20382e-09	-1.4597	1.20382
		-1.45953e-06	1.20093e-09	-1.45953	1.20093
		-1.45935e-06	1.19877e-09	-1.45935	1.19877
		-1.45917e-06	1.19763e-09	-1.45917	1.19763
		-1.45897e-06	1.19755e-09	-1.45897	1.19755
		-1.45876e-06	1.19834e-09	-1.45876	1.19834
		-1.45854e-06	1.19979e-09	-1.45854	1.19979
		-1.45832e-06	1.20176e-09	-1.45832	1.20176
		-1.4581e-06	1.20426e-09	-1.4581	1.20426
		-1.45786e-06	1.20737e-09	-1.45786	1.20737
		-1.45762e-06	1.21117e-09	-1.45762	1.21117
		-1.45738e-06	1.2156e-09	-1.45738	1.2156
		-1.45712e-06	1.2205e-09	-1.45712	1.2205
		-1.45687e-06	1.2256e-09	-1.45687	1.2256
		-1.45662e-06	1.23063e-09	-1.45662	1.23063
		-1.45636e-06	1.23544e-09	-1.45636	1.23544
		-1.45612e-06	1.23996e-09	-1.45612	1.23996
		-1.45587e-06	1.24425e-09	-1.45587	1.24425
		-1.45563e-06	1.24831e-09	-1.45563	1.24831
		-1.45539e-06	1.25215e-09	-1.45539	1.25215
		-1.45515e-06	1.25575e-09	-1.45515	1.25575
		-1.45491e-06	1.25916e-09	-1.45491	1.25916
		-1.45468e-06	1.26244e-09	-1.45468	1.26244
		-1.45444e-06	1.26572e-09	-1.45444	1.26572
		-1.45421e-06	1.26911e-09	-1.45421	1.26911
		-1.45397e-06	1.27264e-09	-1.45397	1.27264
		-1.45373e-06	1.27624e-09	-1.45373	1.27624
		-1.45349e-06	1.27988e-09	-1.45349	1.27988
		-1.45325e-06	1.28354e-09	-1.45325	1.28354
		-1.45301e-06	1.28722e-09	-1.45301	1.28722
		-1.45277e-06	1.29092e-09	-1.45277	1.29092
		-1.45254e-06	1.29452e-09	-1.45254	1.29452
		-1.4523e-06	1.29782e-09	-1.4523	1.29782
		-1.45207e-06	1.30051e-09	-1.45207	1.30051
		-1.45185e-06	1.30222e-09	-1.45185	1.30222
		-1.45165e-06	1.3027e-09	-1.45165	1.3027
		-1.45146e-06	1.30186e-09	-1.45146	1.30186
		-1.45128e-06	1.29974e-09	-1.45128	1.29974
		-1.45111e-06	1.29657e-09	-1.45111	1.29657
		-1.45096e-06	1.29265e-09	-1.45096	1.29265
		-1.4508e-06	1.28837e-09	-1.4508	1.28837
		-1.45065e-06	1.2841e-09	-1.45065	1.2841
		-1.45049e-06	1.28025e-09	-1.45049	1.28025
		-1.45032e-06	1.27713e-09	-1.45032	1.27713
		-1.45014e-06	1.27492e-09	-1.45014	1.27492
		-1.44996e-06	1.27368e-09	-1.44996	1.27368
		-1.44976e-06	1.27327e-09	-1.44976	1.27327
		-1.44956e-06	1.27331e-09	-1.44956	1.27331
		-1.44936e-06	1.27339e-09	-1.44936	1.27339
		-1.44916e-06	1.27298e-09	-1.44916	1.27298
		-1.44898e-06	1.27158e-09	-1.44898	1.27158
		-1.44881e-06	1.26882e-09	-1.44881	1.26882
		-1.44865e-06	1.26449e-09	-1.44865	1.26449
		-1.44852e-06	1.25857e-09	-1.44852	1.25857
		-1.44839e-06	1.25128e-09	-1.44839	1.25128
		-1.44828e-06	1.24304e-09	-1.44828	1.24304
		-1.44817e-06	1.23438e-09	-1.44817	1.23438
		-1.44806e-06	1.22587e-09	-1.44806	1.22587
		-1.44795e-06	1.21796e-09	-1.44795	1.21796
		-1.44782e-06	1.21088e-09	-1.44782	1.21088
		-1.44769e-06	1.20469e-09	-1.44769	1.20469
		-1.44755e-06	1.19927e-09	-1.44755	1.19927
		-1.4474e-06	1.19454e-09	-1.4474	1.19454
		-1.44724e-06	1.19038e-09	-1.44724	1.19038
		-1.44708e-06	1.18674e-09	-1.44708	1.18674
		-1.44691e-06	1.18356e-09	-1.44691	1.18356
		-1.44674e-06	1.18081e-09	-1.44674	1.18081
		-1.44657e-06	1.17841e-09	-1.44657	1.17841
		-1.44639e-06	1.1763e-09	-1.44639	1.1763
		-1.44621e-06	1.17453e-09	-1.44621	1.17453
		-1.44602e-06	1.17307e-09	-1.44602	1.17307
		-1.44584e-06	1.17185e-09	-1.44584	1.17185
		-1.44565e-06	1.17072e-09	-1.44565	1.17072
		-1.44546e-06	1.1695e-09	-1.44546	1.1695
		-1.44528e-06	1.16808e-09	-1.44528	1.16808
		-1.44509e-06	1.16646e-09	-1.44509	1.16646
		-1.44491e-06	1.16474e-09	-1.44491	1.16474
		-1.44473e-06	1.16306e-09	-1.44473	1.16306
		-1.44455e-06	1.16152e-09	-1.44455	1.16152
		-1.44436e-06	1.16013e-09	-1.44436	1.16013
		-1.44417e-06	1.15884e-09	-1.44417	1.15884
		-1.44399e-06	1.15754e-09	-1.44399	1.15754
		-1.4438e-06	1.1562e-09	-1.4438	1.1562
		-1.44362e-06	1.15475e-09	-1.44362	1.15475
		-1.44343e-06	1.15319e-09	-1.44343	1.15319
		-1.44325e-06	1.1516e-09	-1.44325	1.1516
		-1.44307e-06	1.15019e-09	-1.44307	1.15019
		-1.44288e-06	1.14921e-09	-1.44288	1.14921
		-1.44268e-06	1.14899e-09	-1.44268	1.14899
		-1.44247e-06	1.14973e-09	-1.44247	1.14973
		-1.44225e-06	1.15142e-09	-1.44225	1.15142
		-1.44203e-06	1.15386e-09	-1.44203	1.15386
		-1.4418e-06	1.1567e-09	-1.4418	1.1567
		-1.44156e-06	1.15959e-09	-1.44156	1.15959
		-1.44134e-06	1.16233e-09	-1.44134	1.16233
		-1.44111e-06	1.16484e-09	-1.44111	1.16484
		-1.44088e-06	1.16725e-09	-1.44088	1.16725
		-1.44066e-06	1.16962e-09	-1.44066	1.16962
		-1.44043e-06	1.17196e-09	-1.44043	1.17196
		-1.44021e-06	1.17423e-09	-1.44021	1.17423
		-1.43999e-06	1.17643e-09	-1.43999	1.17643
		-1.43976e-06	1.17862e-09	-1.43976	1.17862
		-1.43954e-06	1.18104e-09	-1.43954	1.18104
		-1.43931e-06	1.18401e-09	-1.43931	1.18401
		-1.43906e-06	1.18782e-09	-1.43906	1.18782
		-1.43881e-06	1.19257e-09	-1.43881	1.19257
		-1.43855e-06	1.19815e-09	-1.43855	1.19815
		-1.43829e-06	1.20421e-09	-1.43829	1.20421
		-1.43802e-06	1.2104e-09	-1.43802	1.2104
		-1.43776e-06	1.21631e-09	-1.43776	1.21631
		-1.4375e-06	1.22166e-09	-1.4375	1.22166
		-1.43726e-06	1.22631e-09	-1.43726	1.22631
		-1.43701e-06	1.23022e-09	-1.43701	1.23022
		-1.43678e-06	1.23341e-09	-1.43678	1.23341
		-1.43655e-06	1.23597e-09	-1.43655	1.23597
		-1.43633e-06	1.23791e-09	-1.43633	1.23791
		-1.43612e-06	1.23928e-09	-1.43612	1.23928
		-1.43591e-06	1.24009e-09	-1.43591	1.24009
		-1.4357e-06	1.24047e-09	-1.4357	1.24047
		-1.4355e-06	1.24064e-09	-1.4355	1.24064
		-1.4353e-06	1.24094e-09	-1.4353	1.24094
		-1.43509e-06	1.24156e-09	-1.43509	1.24156
		-1.43488e-06	1.24258e-09	-1.43488	1.24258
		-1.43467e-06	1.2439e-09	-1.43467	1.2439
		-1.43445e-06	1.24519e-09	-1.43445	1.24519
		-1.43424e-06	1.24608e-09	-1.43424	1.24608
		-1.43404e-06	1.24627e-09	-1.43404	1.24627
		-1.43385e-06	1.24561e-09	-1.43385	1.24561
		-1.43367e-06	1.24414e-09	-1.43366	1.24414
		-1.43349e-06	1.24206e-09	-1.43349	1.24206
		-1.43331e-06	1.23966e-09	-1.43331	1.23966
		-1.43314e-06	1.23724e-09	-1.43314	1.23724
		-1.43296e-06	1.23501e-09	-1.43296	1.23501
		-1.43278e-06	1.233e-09	-1.43278	1.233
		-1.4326e-06	1.23114e-09	-1.4326	1.23114
		-1.43242e-06	1.22916e-09	-1.43242	1.22916
		-1.43225e-06	1.22682e-09	-1.43225	1.22682
		-1.43208e-06	1.22388e-09	-1.43208	1.22388
		-1.43192e-06	1.22026e-09	-1.43192	1.22026
		-1.43176e-06	1.21598e-09	-1.43176	1.21598
		-1.43161e-06	1.21124e-09	-1.43161	1.21124
		-1.43147e-06	1.20625e-09	-1.43147	1.20625
		-1.43132e-06	1.20121e-09	-1.43132	1.20121
		-1.43117e-06	1.19633e-09	-1.43117	1.19633
		-1.43102e-06	1.19166e-09	-1.43102	1.19166
		-1.43087e-06	1.18726e-09	-1.43087	1.18726
		-1.43071e-06	1.18303e-09	-1.43071	1.18303
		-1.43056e-06	1.17889e-09	-1.43056	1.17889
		-1.4304e-06	1.17463e-09	-1.4304	1.17463
		-1.43025e-06	1.17008e-09	-1.43025	1.17008
		-1.4301e-06	1.16508e-09	-1.4301	1.16508
		-1.42996e-06	1.15958e-09	-1.42996	1.15958
		-1.42982e-06	1.15367e-09	-1.42982	1.15367
		-1.42969e-06	1.14763e-09	-1.42969	1.14763
		-1.42955e-06	1.14179e-09	-1.42955	1.14179
		-1.42941e-06	1.13646e-09	-1.42941	1.13646
		-1.42926e-06	1.13191e-09	-1.42926	1.13191
		-1.42909e-06	1.12826e-09	-1.42909	1.12826
		-1.42892e-06	1.12557e-09	-1.42892	1.12557
		-1.42874e-06	1.12369e-09	-1.42874	1.12369
		-1.42856e-06	1.12245e-09	-1.42856	1.12245
		-1.42836e-06	1.12155e-09	-1.42836	1.12155
		-1.42817e-06	1.12069e-09	-1.42817	1.12069
		-1.42799e-06	1.11961e-09	-1.42799	1.11961
		-1.4278e-06	1.11804e-09	-1.4278	1.11804
		-1.42762e-06	1.11595e-09	-1.42762	1.11595
		-1.42745e-06	1.11333e-09	-1.42745	1.11333
		-1.42728e-06	1.11038e-09	-1.42728	1.11038
		-1.42712e-06	1.10731e-09	-1.42712	1.10731
		-1.42695e-06	1.10445e-09	-1.42695	1.10445
		-1.42677e-06	1.10203e-09	-1.42677	1.10203
		-1.42659e-06	1.10015e-09	-1.42659	1.10015
		-1.42641e-06	1.09875e-09	-1.42641	1.09875
		-1.42622e-06	1.09772e-09	-1.42622	1.09772
		-1.42603e-06	1.09685e-09	-1.42603	1.09685
		-1.42584e-06	1.09598e-09	-1.42584	1.09598
		-1.42565e-06	1.095e-09	-1.42565	1.095
		-1.42546e-06	1.09383e-09	-1.42546	1.09383
		-1.42527e-06	1.09242e-09	-1.42527	1.09242
		-1.42509e-06	1.09073e-09	-1.42509	1.09073
		-1.42491e-06	1.08876e-09	-1.42491	1.08876
		-1.42473e-06	1.08663e-09	-1.42473	1.08663
		-1.42456e-06	1.08452e-09	-1.42456	1.08452
		-1.42438e-06	1.08273e-09	-1.42438	1.08273
		-1.42419e-06	1.08161e-09	-1.42419	1.08161
		-1.42399e-06	1.08151e-09	-1.42399	1.08151
		-1.42377e-06	1.08283e-09	-1.42377	1.08283
		-1.42354e-06	1.08581e-09	-1.42354	1.08581
		-1.42329e-06	1.09051e-09	-1.42329	1.09051
		-1.42303e-06	1.09661e-09	-1.42303	1.09661
		-1.42275e-06	1.10352e-09	-1.42275	1.10352
		-1.42248e-06	1.11039e-09	-1.42248	1.11039
		-1.42222e-06	1.11639e-09	-1.42222	1.11639
		-1.42197e-06	1.12103e-09	-1.42197	1.12103
		-1.42173e-06	1.12422e-09	-1.42173	1.12422
		-1.42151e-06	1.1262e-09	-1.42151	1.1262
		-1.4213e-06	1.12744e-09	-1.4213	1.12744
		-1.42109e-06	1.1284e-09	-1.42109	1.1284
		-1.42088e-06	1.12942e-09	-1.42088	1.12942
		-1.42067e-06	1.13068e-09	-1.42067	1.13068
		-1.42045e-06	1.13232e-09	-1.42045	1.13232
		-1.42022e-06	1.13452e-09	-1.42022	1.13452
		-1.41999e-06	1.1374e-09	-1.41999	1.1374
		-1.41976e-06	1.14105e-09	-1.41976	1.14105
		-1.41951e-06	1.14556e-09	-1.41951	1.14556
		-1.41925e-06	1.15086e-09	-1.41925	1.15086
		-1.41899e-06	1.15676e-09	-1.41899	1.15676
		-1.41872e-06	1.16294e-09	-1.41872	1.16294
		-1.41846e-06	1.16897e-09	-1.41846	1.16897
		-1.4182e-06	1.17433e-09	-1.4182	1.17433
		-1.41796e-06	1.1785e-09	-1.41796	1.1785
		-1.41773e-06	1.18105e-09	-1.41773	1.18105
		-1.41752e-06	1.18179e-09	-1.41752	1.18179
		-1.41733e-06	1.1808e-09	-1.41733	1.1808
		-1.41716e-06	1.17847e-09	-1.41716	1.17847
		-1.41699e-06	1.1754e-09	-1.41699	1.1754
		-1.41682e-06	1.17219e-09	-1.41682	1.17219
		-1.41665e-06	1.1694e-09	-1.41665	1.1694
		-1.41647e-06	1.16736e-09	-1.41647	1.16736
		-1.41629e-06	1.16617e-09	-1.41629	1.16617
		-1.41609e-06	1.16566e-09	-1.41609	1.16566
		-1.41589e-06	1.16556e-09	-1.41589	1.16556
		-1.41569e-06	1.16547e-09	-1.41569	1.16547
		-1.4155e-06	1.16495e-09	-1.4155	1.16495
		-1.41531e-06	1.16366e-09	-1.41531	1.16366
		-1.41514e-06	1.16137e-09	-1.41514	1.16137
		-1.41497e-06	1.15806e-09	-1.41497	1.15806
		-1.41482e-06	1.15392e-09	-1.41482	1.15392
		-1.41467e-06	1.14932e-09	-1.41467	1.14932
		-1.41451e-06	1.14475e-09	-1.41451	1.14475
		-1.41436e-06	1.14062e-09	-1.41436	1.14062
		-1.41419e-06	1.13722e-09	-1.41419	1.13722
		-1.41402e-06	1.1346e-09	-1.41402	1.1346
		-1.41384e-06	1.13262e-09	-1.41384	1.13262
		-1.41366e-06	1.13098e-09	-1.41366	1.13098
		-1.41348e-06	1.12934e-09	-1.41348	1.12934
		-1.4133e-06	1.12739e-09	-1.4133	1.12739
		-1.41312e-06	1.12492e-09	-1.41312	1.12492
		-1.41296e-06	1.12177e-09	-1.41296	1.12177
		-1.4128e-06	1.11791e-09	-1.4128	1.11791
		-1.41265e-06	1.11336e-09	-1.41265	1.11336
		-1.4125e-06	1.10821e-09	-1.4125	1.10821
		-1.41236e-06	1.10252e-09	-1.41236	1.10252
		-1.41223e-06	1.09643e-09	-1.41223	1.09643
		-1.41209e-06	1.09012e-09	-1.41209	1.09012
		-1.41196e-06	1.08382e-09	-1.41196	1.08382
		-1.41182e-06	1.07783e-09	-1.41182	1.07783
		-1.41168e-06	1.07245e-09	-1.41168	1.07245
		-1.41153e-06	1.06793e-09	-1.41153	1.06793
		-1.41137e-06	1.06447e-09	-1.41137	1.06447
		-1.41119e-06	1.06217e-09	-1.41119	1.06217
		-1.411e-06	1.06105e-09	-1.411	1.06105
		-1.4108e-06	1.06095e-09	-1.4108	1.06095
		-1.4106e-06	1.06166e-09	-1.4106	1.06166
		-1.41038e-06	1.06272e-09	-1.41038	1.06272
		-1.41017e-06	1.06362e-09	-1.41017	1.06362
		-1.40997e-06	1.06381e-09	-1.40997	1.06381
		-1.40978e-06	1.06303e-09	-1.40978	1.06303
		-1.4096e-06	1.06124e-09	-1.4096	1.06124
		-1.40943e-06	1.05872e-09	-1.40943	1.05872
		-1.40926e-06	1.05591e-09	-1.40926	1.05591
		-1.40908e-06	1.05335e-09	-1.40908	1.05335
		-1.4089e-06	1.05136e-09	-1.4089	1.05136
		-1.40872e-06	1.05004e-09	-1.40872	1.05004
		-1.40853e-06	1.04935e-09	-1.40853	1.04935
		-1.40833e-06	1.04915e-09	-1.40833	1.04915
		-1.40813e-06	1.04928e-09	-1.40813	1.04928
		-1.40792e-06	1.0497e-09	-1.40792	1.0497
		-1.40771e-06	1.05048e-09	-1.40771	1.05048
		-1.4075e-06	1.05167e-09	-1.4075	1.05167
		-1.40728e-06	1.05328e-09	-1.40728	1.05328
		-1.40706e-06	1.05526e-09	-1.40706	1.05526
		-1.40684e-06	1.05742e-09	-1.40684	1.05742
		-1.40662e-06	1.05967e-09	-1.40662	1.05967
		-1.40639e-06	1.06189e-09	-1.40639	1.06189
		-1.40617e-06	1.06404e-09	-1.40617	1.06404
		-1.40595e-06	1.06613e-09	-1.40595	1.06613
		-1.40572e-06	1.06825e-09	-1.40572	1.06825
		-1.4055e-06	1.07046e-09	-1.4055	1.07046
		-1.40527e-06	1.07292e-09	-1.40527	1.07292
		-1.40504e-06	1.07579e-09	-1.40504	1.07579
		-1.40481e-06	1.0793e-09	-1.40481	1.0793
		-1.40456e-06	1.08354e-09	-1.40456	1.08354
		-1.40431e-06	1.0885e-09	-1.40431	1.0885
		-1.40405e-06	1.09411e-09	-1.40405	1.09411
		-1.40378e-06	1.10018e-09	-1.40378	1.10018
		-1.40352e-06	1.10649e-09	-1.40352	1.10649
		-1.40325e-06	1.1128e-09	-1.40325	1.1128
		-1.40299e-06	1.11884e-09	-1.40299	1.11884
		-1.40273e-06	1.12443e-09	-1.40273	1.12443
		-1.40247e-06	1.12938e-09	-1.40247	1.12938
		-1.40223e-06	1.13355e-09	-1.40223	1.13355
		-1.40199e-06	1.13688e-09	-1.40199	1.13688
		-1.40177e-06	1.13923e-09	-1.40177	1.13923
		-1.40156e-06	1.14047e-09	-1.40156	1.14047
		-1.40136e-06	1.14045e-09	-1.40136	1.14045
		-1.40117e-06	1.1392e-09	-1.40117	1.1392
		-1.40099e-06	1.13706e-09	-1.40099	1.13706
		-1.40082e-06	1.13452e-09	-1.40082	1.13452
		-1.40064e-06	1.13234e-09	-1.40064	1.13234
		-1.40045e-06	1.1312e-09	-1.40045	1.1312
		-1.40025e-06	1.13152e-09	-1.40025	1.13152
		-1.40003e-06	1.13333e-09	-1.40003	1.13333
		-1.3998e-06	1.13631e-09	-1.3998	1.13631
		-1.39956e-06	1.13988e-09	-1.39956	1.13988
		-1.39932e-06	1.14332e-09	-1.39932	1.14332
		-1.3991e-06	1.14604e-09	-1.3991	1.14604
		-1.39888e-06	1.14765e-09	-1.39888	1.14765
		-1.39867e-06	1.148e-09	-1.39867	1.148
		-1.39848e-06	1.14719e-09	-1.39848	1.14719
		-1.3983e-06	1.14537e-09	-1.3983	1.14537
		-1.39813e-06	1.14279e-09	-1.39813	1.14279
		-1.39796e-06	1.13971e-09	-1.39796	1.13971
		-1.3978e-06	1.13634e-09	-1.3978	1.13634
		-1.39764e-06	1.13288e-09	-1.39764	1.13288
		-1.39747e-06	1.12946e-09	-1.39747	1.12946
		-1.39731e-06	1.12612e-09	-1.39731	1.12612
		-1.39714e-06	1.12282e-09	-1.39714	1.12282
		-1.39698e-06	1.11939e-09	-1.39698	1.11939
		-1.39682e-06	1.11576e-09	-1.39682	1.11576
		-1.39666e-06	1.11189e-09	-1.39666	1.11189
		-1.3965e-06	1.1078e-09	-1.3965	1.1078
		-1.39635e-06	1.10342e-09	-1.39635	1.10342
		-1.3962e-06	1.09864e-09	-1.3962	1.09864
		-1.39605e-06	1.0933e-09	-1.39605	1.0933
		-1.39592e-06	1.08724e-09	-1.39592	1.08724
		-1.39579e-06	1.08039e-09	-1.39579	1.08039
		-1.39567e-06	1.07295e-09	-1.39567	1.07295
		-1.39555e-06	1.06534e-09	-1.39555	1.06534
		-1.39543e-06	1.05809e-09	-1.39543	1.05809
		-1.3953e-06	1.05178e-09	-1.3953	1.05178
		-1.39515e-06	1.04681e-09	-1.39515	1.04682
		-1.39498e-06	1.04341e-09	-1.39498	1.04341
		-1.3948e-06	1.04148e-09	-1.3948	1.04148
		-1.39461e-06	1.04067e-09	-1.39461	1.04067
		-1.39442e-06	1.04042e-09	-1.39442	1.04042
		-1.39422e-06	1.0401e-09	-1.39422	1.0401
		-1.39403e-06	1.03916e-09	-1.39403	1.03916
		-1.39385e-06	1.03715e-09	-1.39385	1.03715
		-1.39369e-06	1.03381e-09	-1.39369	1.03381
		-1.39354e-06	1.02915e-09	-1.39354	1.02915
		-1.3934e-06	1.02343e-09	-1.3934	1.02343
		-1.39326e-06	1.01705e-09	-1.39326	1.01705
		-1.39313e-06	1.01056e-09	-1.39313	1.01056
		-1.393e-06	1.0046e-09	-1.393	1.0046
		-1.39285e-06	9.99772e-10	-1.39285	0.999772
		-1.39268e-06	9.96523e-10	-1.39268	0.996523
		-1.3925e-06	9.95111e-10	-1.3925	0.995111
		-1.39229e-06	9.95529e-10	-1.39229	0.995529
		-1.39207e-06	9.97475e-10	-1.39207	0.997475
		-1.39184e-06	1.00041e-09	-1.39184	1.00041
		-1.39161e-06	1.0036e-09	-1.39161	1.0036
		-1.39138e-06	1.00631e-09	-1.39138	1.00631
		-1.39116e-06	1.0079e-09	-1.39116	1.0079
		-1.39096e-06	1.00793e-09	-1.39096	1.00793
		-1.39078e-06	1.00624e-09	-1.39078	1.00624
		-1.39061e-06	1.00289e-09	-1.39061	1.00289
		-1.39046e-06	9.983e-10	-1.39046	0.9983
		-1.39032e-06	9.93091e-10	-1.39032	0.993091
		-1.39017e-06	9.88111e-10	-1.39017	0.988111
		-1.39001e-06	9.84166e-10	-1.39001	0.984166
		-1.38983e-06	9.82032e-10	-1.38983	0.982032
		-1.38963e-06	9.82132e-10	-1.38963	0.982132
		-1.38941e-06	9.84576e-10	-1.38941	0.984576
		-1.38916e-06	9.89192e-10	-1.38916	0.989192
		-1.38889e-06	9.95566e-10	-1.38889	0.995566
		-1.38861e-06	1.00321e-09	-1.38861	1.00321
		-1.38832e-06	1.01158e-09	-1.38832	1.01158
		-1.38803e-06	1.02008e-09	-1.38803	1.02008
		-1.38774e-06	1.02821e-09	-1.38774	1.02821
		-1.38747e-06	1.03548e-09	-1.38747	1.03548
		-1.3872e-06	1.04155e-09	-1.3872	1.04155
		-1.38695e-06	1.04628e-09	-1.38695	1.04628
		-1.38671e-06	1.04972e-09	-1.38671	1.04972
		-1.38649e-06	1.05206e-09	-1.38649	1.05206
		-1.38627e-06	1.05368e-09	-1.38627	1.05368
		-1.38606e-06	1.05494e-09	-1.38606	1.05494
		-1.38585e-06	1.05618e-09	-1.38585	1.05618
		-1.38563e-06	1.05764e-09	-1.38563	1.05764
		-1.38541e-06	1.0595e-09	-1.38541	1.0595
		-1.38519e-06	1.0618e-09	-1.38519	1.0618
		-1.38496e-06	1.0646e-09	-1.38496	1.0646
		-1.38472e-06	1.06788e-09	-1.38472	1.06788
		-1.38448e-06	1.07156e-09	-1.38448	1.07156
		-1.38424e-06	1.07545e-09	-1.38424	1.07545
		-1.384e-06	1.07918e-09	-1.384	1.07918
		-1.38377e-06	1.08232e-09	-1.38377	1.08232
		-1.38354e-06	1.08447e-09	-1.38354	1.08447
		-1.38333e-06	1.08544e-09	-1.38333	1.08544
		-1.38314e-06	1.08534e-09	-1.38314	1.08534
		-1.38294e-06	1.08452e-09	-1.38294	1.08452
		-1.38276e-06	1.08347e-09	-1.38276	1.08347
		-1.38256e-06	1.0827e-09	-1.38256	1.0827
		-1.38237e-06	1.08248e-09	-1.38237	1.08248
		-1.38216e-06	1.08281e-09	-1.38216	1.08281
		-1.38195e-06	1.08355e-09	-1.38195	1.08355
		-1.38174e-06	1.08442e-09	-1.38174	1.08442
		-1.38154e-06	1.08521e-09	-1.38154	1.08521
		-1.38133e-06	1.08584e-09	-1.38133	1.08584
		-1.38112e-06	1.0863e-09	-1.38112	1.0863
		-1.38092e-06	1.08654e-09	-1.38092	1.08654
		-1.38072e-06	1.08638e-09	-1.38072	1.08638
		-1.38053e-06	1.08546e-09	-1.38053	1.08546
		-1.38035e-06	1.08343e-09	-1.38035	1.08343
		-1.38019e-06	1.07997e-09	-1.38019	1.07997
		-1.38004e-06	1.07504e-09	-1.38004	1.07504
		-1.37991e-06	1.06882e-09	-1.37991	1.06882
		-1.37979e-06	1.0617e-09	-1.37979	1.0617
		-1.37967e-06	1.05405e-09	-1.37967	1.05405
		-1.37955e-06	1.04624e-09	-1.37955	1.04624
		-1.37943e-06	1.03858e-09	-1.37943	1.03858
		-1.37931e-06	1.03135e-09	-1.37931	1.03135
		-1.37918e-06	1.0248e-09	-1.37918	1.0248
		-1.37904e-06	1.01915e-09	-1.37904	1.01915
		-1.37889e-06	1.01443e-09	-1.37889	1.01443
		-1.37873e-06	1.01053e-09	-1.37873	1.01053
		-1.37856e-06	1.0072e-09	-1.37856	1.0072
		-1.3784e-06	1.00413e-09	-1.3784	1.00413
		-1.37823e-06	1.00113e-09	-1.37823	1.00113
		-1.37806e-06	9.9809e-10	-1.37806	0.99809
		-1.37789e-06	9.94963e-10	-1.37789	0.994963
		-1.37773e-06	9.91698e-10	-1.37773	0.991698
		-1.37757e-06	9.88168e-10	-1.37757	0.988168
		-1.37741e-06	9.84256e-10	-1.37741	0.984256
		-1.37725e-06	9.79902e-10	-1.37725	0.979902
		-1.3771e-06	9.75227e-10	-1.3771	0.975227
		-1.37695e-06	9.70556e-10	-1.37695	0.970556
		-1.3768e-06	9.66396e-10	-1.3768	0.966396
		-1.37663e-06	9.63226e-10	-1.37663	0.963226
		-1.37645e-06	9.61419e-10	-1.37645	0.961419
		-1.37625e-06	9.61056e-10	-1.37625	0.961056
		-1.37604e-06	9.61928e-10	-1.37604	0.961928
		-1.37583e-06	9.63506e-10	-1.37583	0.963506
		-1.37561e-06	9.65216e-10	-1.37561	0.965216
		-1.37539e-06	9.66495e-10	-1.37539	0.966495
		-1.37519e-06	9.66945e-10	-1.37519	0.966945
		-1.375e-06	9.66377e-10	-1.375	0.966377
		-1.37481e-06	9.64742e-10	-1.37481	0.964742
		-1.37464e-06	9.62158e-10	-1.37464	0.962158
		-1.37448e-06	9.58859e-10	-1.37448	0.958859
		-1.37431e-06	9.55208e-10	-1.37431	0.955208
		-1.37415e-06	9.51728e-10	-1.37415	0.951728
		-1.37398e-06	9.48988e-10	-1.37398	0.948988
		-1.3738e-06	9.47501e-10	-1.3738	0.947501
		-1.37359e-06	9.47638e-10	-1.37359	0.947638
		-1.37337e-06	9.49546e-10	-1.37337	0.949546
		-1.37314e-06	9.53181e-10	-1.37314	0.953181
		-1.37288e-06	9.58347e-10	-1.37288	0.958347
		-1.37261e-06	9.64667e-10	-1.37261	0.964667
		-1.37234e-06	9.71599e-10	-1.37234	0.971599
		-1.37207e-06	9.78445e-10	-1.37207	0.978445
		-1.3718e-06	9.84529e-10	-1.3718	0.984529
		-1.37155e-06	9.89231e-10	-1.37155	0.989231
		-1.37132e-06	9.92247e-10	-1.37132	0.992247
		-1.3711e-06	9.93729e-10	-1.3711	0.993729
		-1.3709e-06	9.94211e-10	-1.3709	0.994211
		-1.3707e-06	9.94522e-10	-1.3707	0.994522
		-1.37049e-06	9.95514e-10	-1.37049	0.995514
		-1.37026e-06	9.97844e-10	-1.37026	0.997843
		-1.37002e-06	1.00173e-09	-1.37002	1.00173
		-1.36976e-06	1.00699e-09	-1.36976	1.00699
		-1.3695e-06	1.013e-09	-1.3695	1.013
		-1.36924e-06	1.01903e-09	-1.36924	1.01903
		-1.36898e-06	1.02443e-09	-1.36898	1.02443
		-1.36873e-06	1.02884e-09	-1.36873	1.02884
		-1.3685e-06	1.03216e-09	-1.3685	1.03216
		-1.36827e-06	1.0345e-09	-1.36827	1.0345
		-1.36805e-06	1.03611e-09	-1.36805	1.03611
		-1.36784e-06	1.03722e-09	-1.36784	1.03722
		-1.36763e-06	1.03798e-09	-1.36763	1.03798
		-1.36743e-06	1.03848e-09	-1.36743	1.03848
		-1.36723e-06	1.03877e-09	-1.36723	1.03877
		-1.36702e-06	1.03888e-09	-1.36702	1.03888
		-1.36683e-06	1.03872e-09	-1.36683	1.03872
		-1.36663e-06	1.03825e-09	-1.36663	1.03825
		-1.36644e-06	1.03748e-09	-1.36644	1.03748
		-1.36625e-06	1.03651e-09	-1.36625	1.03651
		-1.36606e-06	1.03554e-09	-1.36606	1.03554
		-1.36587e-06	1.03485e-09	-1.36587	1.03485
		-1.36567e-06	1.03465e-09	-1.36567	1.03465
		-1.36546e-06	1.035e-09	-1.36546	1.035
		-1.36526e-06	1.03578e-09	-1.36526	1.03578
		-1.36505e-06	1.03668e-09	-1.36505	1.03668
		-1.36484e-06	1.03737e-09	-1.36484	1.03737
		-1.36464e-06	1.03753e-09	-1.36464	1.03753
		-1.36444e-06	1.03694e-09	-1.36444	1.03694
		-1.36426e-06	1.0354e-09	-1.36426	1.0354
		-1.36409e-06	1.03281e-09	-1.36409	1.03281
		-1.36393e-06	1.02911e-09	-1.36393	1.02911
		-1.36378e-06	1.02435e-09	-1.36378	1.02435
		-1.36364e-06	1.01871e-09	-1.36364	1.01871
		-1.3635e-06	1.01259e-09	-1.3635	1.01259
		-1.36337e-06	1.00647e-09	-1.36337	1.00647
		-1.36323e-06	1.00079e-09	-1.36323	1.00079
		-1.36308e-06	9.95828e-10	-1.36308	0.995828
		-1.36292e-06	9.9163e-10	-1.36292	0.99163
		-1.36276e-06	9.88017e-10	-1.36276	0.988017
		-1.3626e-06	9.84684e-10	-1.3626	0.984684
		-1.36243e-06	9.81381e-10	-1.36243	0.981381
		-1.36227e-06	9.7798e-10	-1.36227	0.97798
		-1.36211e-06	9.74374e-10	-1.36211	0.974374
		-1.36195e-06	9.70545e-10	-1.36195	0.970545
		-1.36179e-06	9.66464e-10	-1.36179	0.966464
		-1.36164e-06	9.62134e-10	-1.36164	0.962134
		-1.36149e-06	9.57573e-10	-1.36149	0.957573
		-1.36133e-06	9.52904e-10	-1.36133	0.952904
		-1.36118e-06	9.48324e-10	-1.36118	0.948324
		-1.36103e-06	9.44028e-10	-1.36103	0.944028
		-1.36087e-06	9.40089e-10	-1.36087	0.940089
		-1.36071e-06	9.36479e-10	-1.36071	0.936479
		-1.36054e-06	9.33116e-10	-1.36054	0.933116
		-1.36038e-06	9.29836e-10	-1.36038	0.929836
		-1.36021e-06	9.26478e-10	-1.36021	0.926478
		-1.36005e-06	9.22971e-10	-1.36005	0.922971
		-1.35989e-06	9.19303e-10	-1.35989	0.919303
		-1.35973e-06	9.15527e-10	-1.35973	0.915527
		-1.35957e-06	9.11738e-10	-1.35957	0.911738
		-1.35941e-06	9.08114e-10	-1.35941	0.908114
		-1.35924e-06	9.04819e-10	-1.35924	0.904819
		-1.35907e-06	9.02062e-10	-1.35907	0.902062
		-1.3589e-06	8.99932e-10	-1.3589	0.899932
		-1.35871e-06	8.98452e-10	-1.35871	0.898452
		-1.35852e-06	8.97573e-10	-1.35852	0.897573
		-1.35833e-06	8.9717e-10	-1.35833	0.89717
		-1.35813e-06	8.97111e-10	-1.35813	0.897111
		-1.35792e-06	8.97313e-10	-1.35792	0.897313
		-1.35772e-06	8.97813e-10	-1.35772	0.897813
		-1.35751e-06	8.98717e-10	-1.35751	0.898717
		-1.35729e-06	9.00107e-10	-1.35729	0.900107
		-1.35707e-06	9.01979e-10	-1.35707	0.901979
		-1.35685e-06	9.043e-10	-1.35685	0.9043
		-1.35662e-06	9.07004e-10	-1.35662	0.907004
		-1.35639e-06	9.09991e-10	-1.35639	0.909991
		-1.35615e-06	9.13247e-10	-1.35615	0.913247
		-1.35592e-06	9.16774e-10	-1.35592	0.916774
		-1.35568e-06	9.20494e-10	-1.35568	0.920494
		-1.35544e-06	9.24229e-10	-1.35544	0.924229
		-1.3552e-06	9.27815e-10	-1.3552	0.927815
		-1.35496e-06	9.31069e-10	-1.35496	0.931069
		-1.35473e-06	9.3401e-10	-1.35473	0.93401
		-1.3545e-06	9.36844e-10	-1.3545	0.936844
		-1.35427e-06	9.39909e-10	-1.35427	0.939909
		-1.35403e-06	9.43571e-10	-1.35403	0.943571
		-1.35378e-06	9.48055e-10	-1.35378	0.948055
		-1.35353e-06	9.53388e-10	-1.35353	0.953388
		-1.35326e-06	9.59379e-10	-1.35326	0.959379
		-1.353e-06	9.65666e-10	-1.353	0.965666
		-1.35273e-06	9.71869e-10	-1.35273	0.971869
		-1.35247e-06	9.77689e-10	-1.35247	0.977689
		-1.35221e-06	9.82941e-10	-1.35221	0.982942
		-1.35196e-06	9.8748e-10	-1.35196	0.98748
		-1.35172e-06	9.91281e-10	-1.35172	0.991281
		-1.35149e-06	9.94308e-10	-1.35149	0.994308
		-1.35127e-06	9.96561e-10	-1.35127	0.996561
		-1.35105e-06	9.9817e-10	-1.35105	0.99817
		-1.35084e-06	9.9931e-10	-1.35084	0.99931
[truncated: 123,001 more rows]
