# Supplementary material for: Altered N-glycan composition impacts flagella-mediated adhesion in Chlamydomonas reinhardtii
Source: eLife. 2020 Dec 10;9:e58805. doi: 10.7554/eLife.58805 (PMC7759384; doi:10.7554/eLife.58805)
Supplement: Figure 3—figure supplement 2—source data 1. [file elife-58805-fig3-figsupp2-data1.xlsx]

## Sheet: Detachment distance
		WT				IMMan1A				IMXylT1A				IMMan1AxIMXylT1A
			Detachment distance μm				Detachment distance μm				Detachment distance μm				Detachment distance μm
			16.54				11.33				7.606				5.94
			14.27				12.28				13.78				13.68
			15.32				10.86				10.83				6.45
			10.38				9.628				15.48				8.897
			13.13				10.07				11.51				7.25
			7.84				9.295				11.61				10.84
			12.36				12.09				13.38				9.31
			11.4				13.75				15.15				7.872
			11.01				16.42				9.17				9.01
			10.06				10.265				14.05				10.38
			13.19				14.84				14.28				9.361
			17.01				12.38				9.204				7.67
			9.933				9.845				11.8				7.11
			11.53				9.98				9.8				14
			11.931				6.578				12.62				8.5
			9.784				9.746				10.95				13.6
			10.53				12.578				7.76				8.081
			10.448				12.42				8.31				9.555
			10.58				10.48				8.83				7.81
			11.34				11.12				13.11				8.39
			12.36				14.2				12.15
							12.87				13.7
											13.52
											8.733
											12.6
											12.72
											11.2

## Sheet: Total energy
	WT				IMMan1A				IMXylT1A				IMMan1AxIMXylT1A
		Total energy *10-15 J				Total energy *10-15 J				Total energy *10-15 J				Total energy *10-15 J
		24.06				32.65				5.625				1.33
		22.61				18.88				28.91				8.72
		70.24				21.43				16.98				7.21
		51.67				37.468				17.86				10.68
		70.31				21.066				22.6				1.902
		15.85				11.746				8.681				2.381
		46.65				37.226				35.23				2.984
		73.24				44.01				36.56				2.254
		47.29				70.41				21.22				4.448
		31.09				11.353				30.3				20.25
		17.6				10.35				29.65				5.422
		41.29				10.38				23.3				5.634
		46.15				40.64				15.46				5.136
		68.53				13.12				6.302				8.675
		38.22				5.256				46.47				2.104
		55.41				26.54				34.11				3.528
		39				21.93				29.46				3.333
		12.59				27.82				27.43				15.88
		78.62				17.325				3.343				3.195
		59.49				15.54				21.26				5.97
		35.64				18.87				37.96
						54.83				47.3
										26.29
										9.191
										18.26
										23.78
										25.37
