# Supplementary material for: Altered N-glycan composition impacts flagella-mediated adhesion in Chlamydomonas reinhardtii
Source: eLife. 2020 Dec 10;9:e58805. doi: 10.7554/eLife.58805 (PMC7759384; doi:10.7554/eLife.58805)
Supplement: Figure 3—source data 1. [file elife-58805-fig3-data1.xlsx]

## Sheet: Sheet1
FORCE nN						Average energy (10-15J/min)
Wtins	IMman1a	IMxylt1A	IMxylt1axIMman1a			Wtins	IMman1a	IMxylt1A	IMxylt1axIMman1a
3.304	8.652	1.262	0.57			1.45466	2.88173	0.739548	0.223906
2.956	6.078	4.793	1.2			1.58444	1.53746	2.09797	0.637427
8.847	5.114	3.486	2			4.58486	1.9733	1.56787	1.11783
10.48	7.343	2.593	3.089			4.97784	3.89157	1.15375	1.2004
10.81	6.555	8.262	0.63			5.35491	2.09196	1.96351	0.262345
5.07	3.298	2.574	0.726			2.02168	1.26369	0.747717	0.219649
7.455	7.497	5.283	0.917			3.77427	3.07907	2.63303	0.320516
14.82	6.319	3.747	1.283			6.42456	3.20073	2.4132	0.286331
7.635	7.96	7.578	0.816			4.29519	4.28806	2.31407	0.493674
6.635	2.357	6.333	3.131			3.09046	1.10599	2.15658	1.95087
2.604	2.01	7.119	1.552			1.33434	0.697439	2.07633	0.579212
4.199	1.593	8.12	1.626			2.4274	0.838449	2.53151	0.73455
9.014	10.7	2.682	1.436			4.64613	4.12798	1.31017	0.722363
17.23	3.616	1.721	1.545			5.94363	1.31463	0.643061	0.619643
7.989	2.281	9.587	0.545			10.1533	0.799027	3.68225	0.247529
14	8.134	4.926	0.725			10.1009	2.72317	3.11507	0.259412
8.347	3.472	7.923	0.788			3.20342	1.74352	3.79639	0.412449
3.893	6.198	6.097	3.711			5.66333	2.23994	3.30084	1.66196
12.9	3.131	0.823	4.193			3.7037	1.65315	0.378596	2.05556
10.19	3.656	2.572	1.02			1.20502	1.39748	1.62166	0.409091
8.607	2.11	6.08	1.482			7.431	1.32887	3.12428	0.711561
	9.163	8.094				5.24603	4.2603	3.45255
		5.069				2.8835		1.94453
		3.772						1.05244
		4.175						1.44921
		4.667						1.8695
		6.238						2.26518
