# Supplementary material for: Altered N-glycan composition impacts flagella-mediated adhesion in Chlamydomonas reinhardtii
Source: eLife. 2020 Dec 10;9:e58805. doi: 10.7554/eLife.58805 (PMC7759384; doi:10.7554/eLife.58805)
Supplement: Figure 5—figure supplement 1—source data 1. [file elife-58805-fig5-figsupp1-data1.xlsx]

## Sheet: Sheet1
	FORCE nN	Double mutants4-13#					enegy*10-16 J	Double mutants4-13#
		restrictive temprature	disassemble					restrictive temprature	disassemble
		3.959	0.4431					19.46	1.086
		1.358	0.3724					45.2	0.8113
		2.385	0.3761					14.93	0.776
		0.7729	0.5274					2.851	1.539
		0.4666	0.6098					3.714	2.492
		3.361	0.6151					42.02	2.395
		0.2889	0.4849					2.388	1.131
		0.3493	0.2232					6.966	0.2695
		1.853	0.7205					1.122	1.638
			0.4064						1.221
			0.5942						3.319
			0.4115						1.131
