# Supplementary material for: Altered N-glycan composition impacts flagella-mediated adhesion in Chlamydomonas reinhardtii
Source: eLife. 2020 Dec 10;9:e58805. doi: 10.7554/eLife.58805 (PMC7759384; doi:10.7554/eLife.58805)
Supplement: Figure 5—source data 1. [file elife-58805-fig5-data1.xlsx]

## Sheet: Adhesion force Double mutant
Fig 5 A
	WT +Ciliobrevin D		WT -Ciliobrevin D		IMMan1AxIMXylT1A +Ciliobrevin D		IMMan1AxIMXylT1A -Ciliobrevin D
	maximal tension (nN)		maximal tension (nN)		maximal tension (nN)		maximal tension (nN)
	3.304		8		0.57		5.15
	2.956		6.5		1.2		5
	8.847		6.3		2		3.5
	10.48		4		3.089		3.05
	10.81		3.8		0.63		1.7
	5.07		3.2		0.726		1.25
	7.455		3.3		0.917		0.48
	14.82		2.8		1.283		0.52
	7.635		2.7		0.816		0.4
	6.635		2		3.131		0.208
	2.604		1.9		1.552		0.1
	4.199		1.3		1.626		0.25
	9.014		1.15		1.436
	17.23		0.6		1.545
	7.989				0.545
	14				0.725
	8.347				0.788
	3.893				3.711
	12.9				1.02
	10.19				1.482
	8.607

## Sheet: IFT velocity
		WT		IMMan1a xIM XylT-A
	Rep 1	Rep 2	Rep 3	Rep 1	Rep 2	Rep 3
Anterograde	2.92375	2.71958	2.50391	2.59562	2.73216	2.57615
Retrograde	4.86837	4.6315	4.38769	4.43041	4.36297	4.2458
	av
Anterograde	2.71575			2.63464
Retrograde	4.62919			4.34639
	SD
Anterograde	0.171422			0.0694075
Retrograde	0.196242			0.0762731
	p
Anterograde	0.568724
Retrograde	0.130313

## Sheet: Gliding events 
	WT			IMMan1a xIM XylT-A
portion	Rep 1	Rep 2	Rep 3	Rep 1	Rep 2	Rep 3
non-gliding events	0.49	0.37	0.41	0.39	0.43	0.45
gliding events	0.51	0.63	0.59	0.61	0.57	0.55
	av
non-gliding events	0.423333			0.423333
gliding events	0.576667			0.576667
	SD
non-gliding events	0.0498888			0.0249444
gliding events	0.0498888			0.0249444

## Sheet: Glidingvelocitys 
Gliding velocity in µm*s-1
WT	IMMan1a xIM XylT-A
0.4	0.4
0.4	0.4
0.4	0.4
0.4	0.4
0.4	0.4
0.4	0.4
0.4	0.5
0.4	0.5
0.4	0.5
0.4	0.5
0.4	0.5
0.4	0.5
0.4	0.5
0.4	0.5
0.4	0.5
0.4	0.5
0.4	0.5
0.4	0.5
0.5	0.6
0.5	0.6
0.5	0.6
0.5	0.6
0.5	0.6
0.5	0.6
0.5	0.6
0.5	0.6
0.5	0.6
0.5	0.6
0.5	0.6
0.6	0.6
0.6	0.6
0.6	0.6
0.6	0.7
0.6	0.7
0.6	0.7
0.6	0.7
0.6	0.7
0.6	0.7
0.6	0.7
0.6	0.7
0.7	0.7
0.7	0.7
0.7	0.8
0.7	0.8
0.7	0.8
0.7	0.8
0.7	0.8
0.8	0.8
0.8	0.8
0.8	0.8
0.8	0.8
0.8	0.9
0.8	0.9
0.8	0.9
0.8	0.9
0.8	0.9
0.9	0.9
0.9	0.9
0.9	0.9
0.9	0.9
0.9	0.9
0.9	0.9
0.9	0.9
0.9	0.9
0.9	0.9
0.9	0.9
1	1
1	1
1	1
1	1
1	1.1
1.1	1.1
1.1	1.1
1.1	1.1
1.1	1.1
1.2	1.1
1.2	1.1
1.2	1.2
1.2	1.2
1.2	1.2
1.3	1.2
1.3	1.3
1.3	1.3
1.3	1.4
1.4	1.4
1.4	1.4
1.4	1.4
1.4	1.4
1.4	1.4
1.5	1.4
1.5	1.4
1.5	1.4
1.5	1.4
1.6	1.5
1.6	1.5
1.6	1.5
1.6	1.5
1.6	1.5
1.6	1.6
1.7	1.6
1.7	1.6
1.7	1.7
1.8	1.7
1.8	1.8
1.8	1.8
1.9	1.8
1.9	1.8
1.9	1.8
1.9	1.8
2	1.8
2.1	1.8
2.1	1.9
2.1	1.9
2.1	2
2.2	2
2.3	2.1
2.3	2.1
2.3	2.1
2.4	2.2
2.4	2.4
2.6	2.5
2.6	2.6
2.6	2.6
2.7	2.6
2.8	2.7
2.8	2.7
2.9	2.8
2.9	2.9
3.1	2.9
3.2	3
3.2	3.1
3.6	3.2
3.6	3.2
3.6	3.8
	4.1
	4.1
	4.5
